1 **Inhibition of photosynthetic CO<sub>2</sub> fixation in the coral *Pocillopora damicornis* and its**  
2 **relationship to thermal bleaching**

3

4 Running title: Dark reaction inhibition in *Symbiodinium*

5

6 Ross Hill<sup>1\*</sup>, Milán Szabó<sup>2</sup>, Ateeq ur Rehman<sup>3</sup>, Imre Vass<sup>3</sup>, Peter J. Ralph<sup>2</sup>, Anthony W.D.  
7 Larkum<sup>2</sup>

8

9 <sup>1</sup> Centre for Marine Bio-Innovation and Sydney Institute of Marine Science, School of  
10 Biological, Earth and Environmental Sciences, The University of New South Wales, Sydney  
11 2052 NSW, Australia

12 <sup>2</sup> Plant Functional Biology and Climate Change Cluster, University of Technology, Sydney,  
13 PO Box 123, Broadway, New South Wales 2007, Australia

14 <sup>3</sup> Institute of Plant Biology, Biological Research Center of the Hungarian Academy of  
15 Sciences, Szeged, Hungary

16

17 \*Corresponding author      Email: ross.hill@unsw.edu.au

18                                      Telephone: +61 4 1379 3581

19                                      Fax: +61 2 9385 1779

20

21 **Abstract**

22

23 Two inhibitors of the Calvin-Benson cycle (glycolaldehyde, GA, and potassium cyanide,  
24 KCN) were used in cultured *Symbiodinium* cells and in nubbins of the coral *Pocillopora*  
25 *damicornis* to test the hypothesis that inhibition of the Calvin-Benson cycle triggers coral  
26 bleaching. Inhibitor concentration range-finding trials aimed to determine the appropriate  
27 concentration to generate inhibition of the Calvin-Benson cycle, but avoid other metabolic  
28 impacts to the symbiont and the animal host. Both 3 mM GA and 20  $\mu$ M KCN caused  
29 minimal inhibition of host respiration, but did induce photosynthetic impairment, measured  
30 by a loss of photosystem II function and oxygen production. GA did not affect the severity of  
31 bleaching, nor induce bleaching in the absence of thermal stress, suggesting inhibition of the  
32 Calvin-Benson cycle by GA does not initiate bleaching in *P. damicornis*. In contrast, KCN  
33 did activate a bleaching response through symbiont expulsion, which occurred in the  
34 presence and absence of thermal stress. While KCN is an inhibitor of the Calvin-Benson  
35 cycle, it also promotes reactive oxygen species formation, and it is likely that this was the  
36 principal agent in the coral bleaching process. These findings do not support the hypothesis  
37 that temperature-induced inhibition of the Calvin-Benson cycle alone induces coral  
38 bleaching.

39

40 **Keyword index**

41

42 Coral bleaching, heat stress, *Symbiodinium*, Calvin-Benson cycle, dark reactions, respiration,

43 photoinhibition, photosynthesis

44

45 **Introduction**

46

47 Reef-building corals form an endosymbiosis with dinoflagellate algae from the genus  
48 *Symbiodinium* (also known as zooxanthellae), which reside within the endodermal tissue of  
49 the cnidarian. This mutualism is key to the high productivity found on coral reefs, often in  
50 oligotrophic, tropical waters, but can be highly sensitive to environmental perturbations, with  
51 a breakdown in the symbiosis a common stress response (Hoegh-Guldberg et al., 2007).

52 Coral bleaching involves the expulsion of *Symbiodinium* and/or the loss of photosynthetic  
53 pigments from within algal cells, resulting in a paling, or bleaching, of the coral. Elevations  
54 in sea surface temperature, as small as 1-2°C above summer average, in combination with  
55 high irradiance, are well known to cause mass coral bleaching events on coral reefs around  
56 the world (Hoegh-Guldberg, 1999). It is forecast that ocean temperatures will continue to  
57 increase with global warming due to anthropogenic emissions of greenhouse gases (IPCC,  
58 2007), placing corals more at risk of having sea temperatures exceed their upper thermal  
59 maximum. Coral bleaching events are therefore predicted to become more frequent,  
60 widespread and severe with climate change (Hoegh-Guldberg, 1999).

61

62 Breakdown in the coral symbiosis has been linked to an initial photosynthetic impairment in  
63 the endosymbiotic algae. A sustained loss of photosynthetic performance in coral symbionts  
64 is a well-defined characteristic of a thermal stress response (Jones et al., 2000). A great deal  
65 of evidence has been collected, primarily through non-invasive chlorophyll fluorescence  
66 techniques, demonstrating the loss of photosystem II (PSII) photochemical efficiency during  
67 a bleaching event (Jones et al., 1998; Warner et al., 1999; Hill et al., 2004a; Hill et al.,  
68 2004b). While such results are indicative of impacts to this early stage of the light reactions  
69 of photosynthesis, it is not clear whether inhibition of PSII activity is the initial site of  
70 damage induced by bleaching conditions, or whether it is a secondary or tertiary impact only  
71 detected following inhibition or damage at another site (Smith et al., 2005). Indeed, this  
72 initial site of impact remains elusive, with many studies aiming to identify the origin of  
73 photosynthetic impairment in *Symbiodinium* under simulated bleaching conditions.

74

75 Photoinhibition, which is largely an impairment of PSII caused by high irradiance, has been  
76 demonstrated in coral symbionts during thermal stress with the rate of photoinactivation of  
77 the core D1 protein exceeding the rate of repair. D1 content has been shown to drop under

78 bleaching conditions, in correlation with declines in PSII photochemical efficiency (Warner  
79 et al., 1999; Robison and Warner, 2006; Hill et al., 2011), and this is likely due to the action  
80 of reactive oxygen species (ROS; Lesser, 2011). The cause of this loss of D1 could be due to  
81 i) inability of the D1 repair mechanism to match the rate of D1 damage (Hill et al., 2011), or  
82 ii) inhibition of the D1 repair mechanism (Takahashi et al., 2009). While evidence exists for  
83 both processes, the end result is the same, with PSII damage leading to photosynthetic  
84 impairment. The capacity for D1 repair has been suggested to control thermal bleaching  
85 vulnerability, with evidence indicating bleaching tolerant species have faster rates of repair,  
86 compared to more susceptible species (Hennige et al., 2011).

87

88 While PSII inhibition has received considerable attention, other components of the  
89 photosynthetic apparatus have also been investigated, including antenna proteins (Takahashi  
90 et al., 2008; Hill et al., 2012), the oxygen evolving complex (Iglesias-Prieto, 1997; Hill and  
91 Ralph, 2008), photosystem I (Hoogenboom et al., 2012), thylakoid membrane integrity  
92 (Tchernov et al., 2004; Hill et al., 2009; Díaz-Almeyda et al., 2011) and the dark reactions  
93 (Jones et al., 1998; Leggat et al., 2004; Lilley et al., 2010; Hill et al., 2011). Thermal  
94 sensitivity of carbon fixation at bleaching-relevant temperatures has been inferred through  
95 measures of PSII chlorophyll fluorescence, where initial damage to the dark reactions  
96 resulted in an electron sink limitation and consequently PSII photoinhibition (Jones et al.,  
97 1998). Carbon-concentrating mechanisms have been found to be unaffected despite inhibition  
98 of photosynthesis (Leggat et al., 2004), and Rubisco protein content of *in hospite* symbionts  
99 has also been shown to remain constant during thermal bleaching (Hill et al., 2011).

100 However, at higher temperatures, Rubisco activity does rapidly drop indicating it is heat-  
101 sensitive; the results of Leggat et al. (2004) were somewhat equivocal but the results of Lilley  
102 et al. (2010) were well substantiated. More recently, Bhagooli (2013) demonstrated that  
103 inhibition of Calvin-Benson cycle activity in the coral *Stylophora pistillata* by the inhibitor  
104 glycolaldehyde (GA) causes photoinhibition and coral bleaching even at optimal  
105 temperatures. Therefore, in this species at least, there is some evidence that bleaching can be  
106 initiated by damage to the dark reactions of photosynthesis in the absence of thermal stress.  
107 To date, the literature contains no conclusive, unifying model that can explain the thermal  
108 bleaching response in corals, but rather an extensive series of independent experiments that  
109 provide detailed responses of specific components of the photosynthetic apparatus (see  
110 review by Lesser, 2011). The focus of these experiments has been predominantly on PSII (in  
111 part due to the ease of direct PSII measurements using chlorophyll fluorescence), with other

112 photosynthetic components, such as the dark reactions, receiving less attention. The existing  
113 studies provide divergent lines of evidence of a primary site of photosynthetic impairment  
114 which highlights the need for further detailed analyses into the mechanism of photosynthetic  
115 impairment of coral symbionts during the onset of thermal bleaching events, especially the  
116 Calvin-Benson cycle which has recently been shown to activate bleaching when chemically  
117 inhibited (Bhagooli, 2013).

118

119 The application of chemical inhibitors can provide a useful means to manipulate the function  
120 of metabolic processes. At low concentrations, GA and cyanide have been used to inhibit the  
121 operation of the Calvin-Benson cycle (Sicher, 1984; Wishnik and Lane, 1969), essential in  
122 the fixation of organic carbon from carbon dioxide. GA is known to inhibit ribulose-1, 5-  
123 diphosphate synthase in this cycle (see e.g. Miller and Canvin, 1989). However, as later  
124 reported by Salon et al., (1998), GA also inhibited carbonic anhydrase in *Synechococcus*  
125 UTEX and at 10 mM GA, only 20% of the total inhibition of photosynthesis could be  
126 ascribed to reduced CO<sub>2</sub> fixation. KCN is also an inhibitor of the Calvin-Benson cycle,  
127 although its specific mode of action is different to GA. KCN inhibits CO<sub>2</sub> fixation by binding  
128 to Rubisco activase and preventing its release from Rubisco (Wishnik and Lane, 1969;  
129 Sicher, 1984) and it also causes inhibition of plastoquinone-oxidoreductase (Buchel and  
130 Garab, 1995), ascorbate peroxidase (Ishida et al., 1998) and the scavenging of hydroxyl  
131 radicals (Jakob and Heber, 1996). The exact mechanism of cyanide action is not well  
132 described in the literature, and since *Symbiodinium* have Type 2 rather than Type 1 Rubisco  
133 (i.e. the Rubisco is composed of mainly 2 large subunits rather than of 8 large and 8 small  
134 subunits), they may not react in the same way to cyanide, i.e. the binding of substrates and  
135 the heat sensitivity may be quite different. Furthermore, in a symbiosis like corals the effect  
136 of these inhibitors on host (animal) tissue has to be taken into account.

137

138 GA has a number of effects in animal tissues, where it interacts with several biochemical  
139 pathways and is inhibitory at a number of levels (e.g. Al-Enezi et al., 2006). KCN also  
140 inhibits mitochondrial respiration, but only at significantly higher concentrations (Barnes,  
141 1985; Jones and Steven, 1997; Jones and Hoegh-Guldberg, 1999). Therefore, at higher  
142 concentrations of these inhibitors, multiple metabolic processes can be impacted, with  
143 specificity of the compound lost, resulting in ambiguous results that cannot provide  
144 convincing evidence of the site of action. The duration of exposure is also an important factor  
145 to consider, with a concentration and time dependent loss of PSII function and coral

146 bleaching response found for GA and cyanide (Jones and Steven, 1997; Buxton et al., 2012).  
147 Therefore, the concentration-dependent action of GA and cyanide on a coral holobiont must  
148 be clearly understood in order to investigate the effect of Calvin-Benson cycle inhibition on  
149 causing coral bleaching. In this study, we ran a series of concentration- and time-dependent  
150 assays to determine the appropriate concentration of the inhibitors. Initially, cultured  
151 *Symbiodinium* were used for the large scale concentration range-finding trails, with  
152 subsequent assays on intact corals used to refine and optimise the appropriate treatments for  
153 experiments on the intact symbiosis.

154

155 It has been proposed that the trigger for coral bleaching lies in the effect of elevated  
156 temperature on the photosynthetic process of the symbiotic zooxanthellae (Lesser, 2011).  
157 Two specific sites in the photosynthetic apparatus have been identified as likely targets i) the  
158 Calvin-Benson cycle, the site of carbon dioxide fixation (Jones et al., 1998; Lilley et al.,  
159 2010), and ii) photosystem II (Warner et al., 1999; Hill et al., 2011). Despite the fact that  
160 coral bleaching has emerged over the last two decades as a complex interaction of many  
161 environmental and genetic factors, operating at several levels with the coral holobiont  
162 (Buxton et al., 2012; Tolleter et al., 2013), these two potential triggers of coral bleaching are  
163 still worthy of detailed research. There has been considerable focus on impacts to PSII, with  
164 fewer studies concentrating on the operation of the dark reactions. Here we focussed on the  
165 bleaching response of the common scleractinian coral, *Pocillopora damicornis* under optimal  
166 and elevated temperature while manipulating the function of the Calvin-Benson cycle using  
167 chemical inhibitors. This is the first study to investigate whether inhibition of the Calvin-  
168 Benson cycle by chemical inhibitors promotes bleaching under thermal stress. The outcomes  
169 provide a detailed insight into the role of a functional Calvin-Benson cycle in maintaining an  
170 intact symbiosis. Specifically, the aim of this work was to characterise impacts to the Calvin-  
171 Benson cycle and the consequences of its inhibition in *Pocillopora damicornis* under thermal  
172 bleaching conditions. We also sought to determine whether inhibition of the dark reactions  
173 induced bleaching at optimal growth temperatures in this species and whether Calvin-Benson  
174 cycle inhibition by GA or KCN accelerated thermal bleaching.

175

## 176 **Results**

177

### 178 *Inhibitor range finding trials*

179 Glycolaldehyde (GA) and potassium cyanide (KCN) concentration range finding tests were  
180 performed on cultured and *in hospite Symbiodinium* of *Pocillopora damicornis*. These trials  
181 were essential for determining the appropriate concentrations to use to generate inhibition of  
182 the Calvin-Benson cycle, while avoiding other metabolic impacts to the symbiont and the  
183 animal host. In the *Symbiodinium* culture, a concentration dependent decline in  $F_v/F_M$  was  
184 found for both inhibitors between 0 to 10 mM for GA, and 0 to 100  $\mu$ M for KCN after 8 h  
185 light exposure (Fig. 1). Following a 12 h dark period,  $F_v/F_M$  continued to decline in all GA  
186 treated samples, while recovery was found in all but the highest KCN concentration. A  
187 subsequent light period resulted in continued decline of  $F_v/F_M$ . These data show that in  
188 *Symbiodinium* cells the application of long term GA treatment damages the photochemical  
189 activity when the concentration is higher than 1 mM. In the case of KCN, inhibition of  
190 photosynthetic activity was largely reversible in darkness up to 50  $\mu$ M. Therefore, long term  
191 GA treatment should be restricted to low mM concentrations, while KCN treatment does not  
192 seem to induce irreversible side effects up 50  $\mu$ M after a few hours of exposure time. Fig. 2  
193 shows the fast induction curves which are double normalized to the O and P steps (relative  
194 variable fluorescence). In the presence of both GA and KCN the J step increases after  
195 incubation of the cells in growth light. These findings demonstrate that the reduction level of  
196 the PQ pool increases due to partial inhibition of the Calvin-Benson cycle, which limits  
197 electron flow towards  $\text{CO}_2$  that acts as the final electron acceptor.

198

199 The goal of these inhibitor assays was to determine concentrations high enough to induce  
200 Calvin-Benson cycle inhibition in the algal symbionts, detectable through measures of PSII  
201 function and oxygen production, while limiting impacts to animal host condition. In the *in*  
202 *hospite Symbiodinium* of *Pocillopora damicornis*,  $F_v/F_M$  showed a concentration dependent  
203 decline (Fig. 3) over 3 h of exposure indicating damage to PSII function, while gross  
204 photosynthetic rates (Fig. 4) declined during exposure to 5 mM GA, as well as 10 and 100  
205  $\mu$ M KCN. Respiration rate was used as an indicator of coral host condition and only declined  
206 in the highest GA and KCN concentrations over the 3 h experiment, suggesting lower  
207 concentrations did not have an inhibitory effect on animal respiration over this time period.  
208 Following these trials, 3 mM GA and 20  $\mu$ M KCN were chosen as appropriate concentrations  
209 to apply in the subsequent experiments.



210

211 *Quantification of bleaching*

212 Nubbins of *P. damicornis* were exposed to 10 h of 26°C, 30°C or 31°C and a subsequent 14 h  
213 of darkness at 26°C. This was done in i) the absence of any inhibitors, ii) 3 mM GA or iii) 20  
214 µM KCN. Bleaching in the coral nubbins was quantified through measures of symbiont  
215 density and chlorophyll concentration (Fig. 5). After 24 h in the 26°C treatments, a  
216 significant decline in symbiont density per cm<sup>2</sup> of coral host was only found in the presence  
217 of KCN when compared to initial symbiont densities at 0 h (one way ANOVA,  $F_{1,6} = 13.520$ ,  
218  $P = 0.010$ ; Fig. 5A). No loss of symbionts was found in the absence of an inhibitor (control)  
219 or the presence of GA at 26°C. However, after 24 h, a significant loss of symbionts was  
220 found in the 30°C and 31°C treatments compared to the 26°C treatment in the absence of  
221 inhibitors (one way ANOVA,  $F_{2,9} = 6.288$ ,  $P = 0.020$ ) and in the presence of GA (one way  
222 ANOVA,  $F_{2,9} = 10.232$ ,  $P = 0.005$ ). Nubbins in all three temperature treatments in the  
223 presence of KCN experienced bleaching to a similar extent by 24 h.

224

225 Chlorophyll *a* concentration per cm<sup>2</sup> of coral host was significantly lower after 24 h at 26°C  
226 in the KCN treatment compared to 0 h (one way ANOVA,  $F_{1,6} = 7.726$ ,  $P = 0.032$ ; Fig. 5B).  
227 Nubbins exposed to 24 h of 30°C and 31°C in the presence of KCN experienced a similar  
228 loss of chlorophyll *a* to the 26°C treatment. In the absence of any inhibitor, chlorophyll *a*  
229 concentration was not affected by thermal exposure after 24 h. However, in the presence of  
230 GA, nubbins lost more chlorophyll *a* following 24 h at 30°C and 31°C compared to the 26°C  
231 treatment. In contrast, no significant changes were found in chlorophyll *c*<sub>2</sub> concentration per  
232 cm<sup>2</sup> of coral host (Fig. 5C) or total chlorophyll per cell (Fig. 5D) over time or between  
233 thermal treatments in the presence or absence of inhibitors.

234

235 *Changes in PSII photochemical efficiency*

236 In the presence or absence of inhibitors,  $F_V/F_M$ , which is a measure of PSII photochemical  
237 efficiency, declined in all three temperature treatments over time (rmANOVAs,  $P$  values <  
238 0.001; Fig. 6). In the absence of inhibitors,  $F_V/F_M$  in the 30°C and 31°C treatments was  
239 significantly lower than the 26°C treatment at 7 h (one way ANOVA,  $F_{2,9} = 27.705$ ,  $P <$   
240 0.001) and 10 h (one way ANOVA,  $F_{2,9} = 17.504$ ,  $P = 0.001$ ; Fig. 6A). Partial recovery of  
241  $F_V/F_M$  was seen in all treatments to a similar level after the 14 h recovery period, but values  
242 did not recover to 0 h levels in any temperature treatment. In the presence of GA,  $F_V/F_M$  was  
243 significantly higher in the 26°C treatment compared to 30°C and 31°C at 10 h (one way

244 ANOVA,  $F_{2,9} = 7.050$ ,  $P = 0.014$ ; Fig. 6B). At the 24 h mark, an almost complete loss of PSII  
245 photochemical efficiency occurred in the 31°C treatment which was significantly lower than  
246  $F_V/F_M$  at 26°C (one way ANOVA,  $F_{2,9} = 5.630$ ,  $P = 0.026$ ). In the presence of KCN, the  
247 decline in  $F_V/F_M$  was intermediate between the controls and the GA treatment (Fig. 6C). The  
248 31°C treatment showed the greatest decline compared to 26°C at 10 h (one way ANOVA,  $F_{2,9}$   
249  $= 9.817$ ,  $P = 0.005$ ) and although no significant recovery was observed in  $F_V/F_M$  by 24 h, the  
250 31°C treatment was lower than both the 26°C and 30°C treatments at this time point (one way  
251 ANOVA,  $F_{2,9} = 10.306$ ,  $P = 0.005$ ).

252

### 253 *Oxygen production and consumption*

254 In the absence of an inhibitor, the rate of net oxygen production did not significantly change  
255 over time, nor was it different between temperature treatments, except at 24 h where the rate  
256 of  $O_2$  production was significantly lower at 31°C, compared to 26°C and 30°C (one way  
257 ANOVA,  $F_{2,9} = 11.628$ ,  $P = 0.003$ ; Fig. 7A). The addition of GA (Fig. 7B) and KCN (Fig.  
258 7C) resulted in temperature-dependent declines in net  $O_2$  production with the higher  
259 temperature treatments experiencing the most rapid loss over the 24 h period (one way  
260 ANOVAs,  $P$  values  $< 0.001$ ).

261

262 The respiration rate of coral nubbins in all temperatures and at all time points did not  
263 significantly change in the absence of an inhibitor (control; Fig. 7A). In comparison, in the  
264 presence of GA, respiration rate approached zero over the 24 h experimental period in all  
265 temperature treatments, with respiration rate significantly lower in the 30°C treatment at 10 h  
266 (compared to 26°C and 31°C; one way ANOVA,  $F_{2,9} = 12.167$ ,  $P = 0.003$ ) and in the 30°C  
267 and 31°C treatment at 24 h (compared to 26°C; one way ANOVA,  $F_{2,9} = 67.058$ ,  $P < 0.001$ ;  
268 Fig. 7B). In the presence of KCN, respiration rate remained constant across temperatures for  
269 the first 10 h. After the recovery period at 24 h, respiration rate had significantly declined at  
270 30°C and 31°C compared to 26°C (one way ANOVA,  $F_{2,9} = 12.981$ ,  $P = 0.002$ ; Fig. 7C).

271

### 272 *Fast induction curves (FICs)*

273 During the application of a saturating pulse, chlorophyll fluorescence shows a polyphasic rise  
274 from minimum ( $F_O$  or the O step) to maximum ( $F_M$  or P step) fluorescence with two  
275 intermediate inflection points, the J and I steps. This OJIP curve provides detailed  
276 information on the reduction and oxidation of the primary ( $Q_A$ ) and secondary ( $Q_B$ ) electron  
277 acceptors of PSII. In the absence of any inhibitor, declines in the J, I and P steps were found

278 along the FICs for each temperature treatment indicating a loss of variable fluorescence (Fig.  
279 8A-C). The relative decline in the J, I and P steps was the same for each curve, as verified in  
280 the double normalisation to the O and P steps where all FICs showed a very similar pattern at  
281 each time point (Fig. S1A-C). Application of GA resulted in a rapid decline in variable  
282 fluorescence with the amplitude of the J, I and P steps approaching zero relative to the O step  
283 over the length of the experiment (Fig. 8D-F). Exposure to KCN showed an intermediate  
284 response with respect to the decline of the J, I and P steps during the exposure period with the  
285 greatest loss of amplitude in the 31°C treatment (Fig. 8G-I). No change in the FICs was  
286 found during the 14 h recovery period in the KCN treatment. Calculation of the relative  
287 variable fluorescence for GA- and KCN-treated nubbins revealed an elevation of the J step  
288 over time for all temperature treatments indicating a greater reduction of  $Q_A$  (Fig. S1D-I).  
289  
290 Calculation of the J:P ratio of FICs revealed significant increases over time in all inhibitor  
291 and temperature treatments (Fig. 9A-C; rmANOVAs, P values < 0.005). A sharp increase  
292 was found from 0 to 10 h in the presence of both GA and KCN at 26°C, 30°C and 31°C. By  
293 the end of the recovery period the J:P ratio was close to one for all temperature treatments  
294 indicating J and P amplitudes were similar, confirming the loss of variable fluorescence  
295 between the J and P steps.

296

### 297 *Functional absorption cross section of PSII ( $\sigma_{PSII}$ )*

298 Measures of  $\sigma_{PSII}$  provide an estimate of the fraction of absorbed light that leads to oxygen  
299 evolution. No change in  $\sigma_{PSII}$  was found in the absence of inhibitors in any of the temperature  
300 treatments indicating no change to the light harvesting capabilities of PSII (Fig. 10A). In  
301 contrast, in the 26°C GA treatment,  $\sigma_{PSII}$  was significantly lower at 4 and 7 h compared to  
302 other time points (Fig. 10B; rmANOVA,  $F_{4,12} = 3.896$ ,  $P = 0.030$ ). In the 30°C and 31°C GA  
303 temperature treatments, as well as all KCN temperature treatments (Fig. 10C),  $\sigma_{PSII}$   
304 significantly declined after 0 h, due to a decrease in the cross sectional area of the  
305 photosynthetic light-harvesting antenna, after which it remained stable (rmANOVAs, P  
306 values < 0.005). In the case of the GA treatment, it was not possible to record reasonable  $\sigma_{PSII}$   
307 values after the 24 h treatment, due to the lack of detectable variable fluorescence (see e.g.  
308 Fig 8 D,E,F); therefore, this data point has been omitted. Significant negative correlations  
309 were found between  $\sigma_{PSII}$  and the J:P ratio in the 31°C GA treatment, plus all three KCN  
310 temperature treatments (Table 1). This indicates that the reduced state of  $Q_A$ , signified by a

311 high J:P ratio, has a direct impact on  $\sigma_{\text{PSII}}$ , where and over-reduced  $Q_A^-$  resulted in a decrease  
312 in the cross-sectional area of photosynthetic light-harvesting antenna.  
313

314 **Discussion**

315

316 *Inhibitors of the Calvin-Benson cycle and considerations for the coral holobiont*

317 Here we tested the hypothesis that inhibition of the Calvin-Benson cycle induces the release  
318 of endosymbionts and/or loss of photosynthetic pigments from a bleaching-sensitive coral  
319 species under thermal stress. We used two inhibitors of the Calvin-Benson cycle that have  
320 been used with corals before: glycolaldehyde (Buxton et al., 2012; Bhagooli, 2013) and  
321 cyanide (Chalker and Taylor, 1975; Barnes, 1985; Jones and Steven, 1997; Jones and Hoegh-  
322 Guldberg, 1999). They have also been widely used for studies on higher plants (Bishop and  
323 Spikes, 1955) and other microalgae (Whittingham, 1952; Takahashi and Murata, 2005). With  
324 both these inhibitors, care was taken to ensure concentrations affected only (or at least  
325 predominantly) the Calvin-Benson cycle. It was therefore necessary to carry out experiments  
326 on the effect of GA and KCN at a range of concentrations on algal photosynthesis and animal  
327 host respiration. GA and KCN concentrations were carefully chosen following a series of  
328 range-finding assays on cultured and *in hospite Symbiodinium* (Fig. 1-4). The goal was to  
329 apply GA and KCN in concentrations high enough to induce inhibition of photosynthesis in  
330 the algal symbionts, but not to interfere with the functioning of host metabolism. Indeed, our  
331 quantifications of photosynthetic damage in the preliminary experiments highlighted the  
332 concentration-dependent decline in  $F_v/F_M$  over time due to the inhibitory effect of GA and  
333 KCN on mechanisms such as photosynthetic dark reactions (Fig. 1). In addition, we also  
334 probed for signs of damage to the animal host through measures of oxygen consumption in  
335 the dark. Gross primary production and respiration rate declined at 5 mM GA and 100  $\mu$ M  
336 KCN over 3 h, but neither process was affected by 1 mM GA or 10  $\mu$ M KCN. An  
337 intermediate concentration of 3 mM GA and 20  $\mu$ M KCN was therefore chosen for  
338 subsequent experiments as it was expected to cause inhibition to the Calvin-Benson cycle (as  
339 probed via measures of  $F_v/F_M$  and oxygen production; Fig. 1-3), but have little impact on  
340 coral host function (Fig. 4). Nevertheless it should also be borne in mind that GA and KCN at  
341 the chosen concentrations may affect other enzymes or processes.

342

343 During subsequent experimentation, GA and KCN exposure lasted for 24 h and measures of  
344 respiration rate suggested that GA did have some effect on host metabolism that was  
345 accelerated by thermal stress (Fig. 7). KCN also impacted host respiration, but only at 31°C  
346 after 24 h of exposure. As the bleaching response was consistent in the presence and absence

347 of GA (Fig. 5), we suggest that although the host experienced damage from the chemical  
348 inhibitor, it did not alter the bleaching process. In comparison, while damage to host  
349 respiration was only found after 24 h in the highest temperature treatment during KCN  
350 exposure, bleaching was accelerated in all treatments by 24 h. Therefore, host condition may  
351 not have played a critical role in the bleaching response.

352

### 353 *The effect of Calvin-Benson cycle inhibition on coral bleaching*

354 *Pocillopora damicornis* is a bleaching sensitive coral species known to live close to its upper  
355 thermal threshold (Marshall and Baird, 2000; Loya et al., 2001; Hill et al., 2004a; Hill et al.,  
356 2004b). Bleaching is well characterised in this species around the world and as previously  
357 reported, we found thermal stress was sufficient to induce a bleaching response characterised  
358 by the expulsion of symbionts, rather than loss of intracellular photosynthetic pigments (Fig.  
359 5; Hill et al., 2011). In this work we were able to confirm that in the absence of any Calvin-  
360 Benson cycle inhibitor, both symbiont density and chlorophyll concentration (per cm<sup>2</sup> of  
361 coral tissue) declined from 0 to 24 h in the 30°C and 31°C, while there was no change in the  
362 26°C treatment.

363

364 GA at 3 mM did not affect the severity of bleaching, nor did it induce bleaching in the  
365 absence of thermal stress. Clearly, then, this evidence does not support the hypothesis that  
366 inhibition of the Calvin-Benson cycle is a key factor in initiating coral bleaching. However, at  
367 higher concentrations GA did have profound effects that were related to an effect on  
368 respiration or the integrity of the animal host. While previous research has shown the effects  
369 of GA on coral bleaching (Bhagooli 2013), these experiments were conducted at a higher  
370 concentration of GA and only investigated effects on photosynthesis and not respiration, and  
371 should therefore be treated with caution. To gain evidence on coral bleaching at 3 mM GA,  
372 we were obliged, for comparison with others' experiments, to carry out our experiments for  
373 up to 24 h, a time frame that is a common practice for coral bleaching experiments (see e.g.  
374 Hill et al., 2012), and it was clear (Fig. 5 and 6) that at this time there were effects other than  
375 inhibition of the Calvin-Benson cycle. GA when applied at a similar concentration (2.5 mM)  
376 in the cyanobacterium *Synechocystis* PCC 6803 it induced a 16% loss of PSII activity in 4  
377 hours; an effect assigned to the inhibition of the repair of photodamaged PSII centres  
378 (Takahashi and Murata, 2005). However, the consequences of long-term GA treatment in  
379 photosynthetic systems have not been investigated previously. Therefore, after 24 h, it is  
380 probable that other effects of GA, on respiration and metabolism of the coral host, would

381 have interfered with the coral bleaching mechanism and prevented the expulsion of  
382 symbionts. However, it should be noted that at earlier time points, no evidence was found for  
383 coral bleaching as it was in the presence of KCN, and therefore we conclude that GA did not  
384 induce coral bleaching conditions at any time.

385

386 Potassium cyanide (KCN), a known inhibitor of CO<sub>2</sub> fixation in higher plants and microalgae  
387 (Whittingham, 1952; Bishop and Spikes, 1955), has been linked with coral bleaching under  
388 field conditions (Jones and Steven, 1997) and in laboratory experiments (Jones et al., 1998,  
389 Jones and Hoegh-Guldberg, 1999). In our experiments, exposure to 20 μM KCN, not only  
390 strongly inhibited photosynthetic oxygen production (without having an impact on respiration  
391 rate), as did 3 mM GA, but unlike GA, also promoted bleaching, with symbiont density and  
392 chlorophyll concentration declining significantly in all three temperature treatments, with no  
393 temperature-dependent effect. Thus we have the interesting situation that of these two  
394 inhibitors of the Calvin-Benson cycle, only KCN induced bleaching. This might suggest that  
395 KCN has other effects besides its effect on the Calvin-Benson cycle.

396

397 An early explanation for the coral bleaching effect of KCN was that with the inhibition of the  
398 Calvin-Benson cycle, electrons would back-up into PSI and PSII and this would generate  
399 large amounts of ROS, offset to some extent by the flow of electrons into the Mehler  
400 Ascorbate Peroxidase (MAP) pathway (Jones et al., 1998; Jones and Hoegh-Guldberg, 1999).  
401 However, the fact that GA inhibits the Calvin-Benson Cycle but does not induce bleaching  
402 seems to require some further explanation for the effect of KCN. We suggest that this is the  
403 action of KCN in inhibiting ascorbate peroxidase (Sigeoka et al., 2002) and stimulating OH<sup>•</sup>  
404 (hydroxyl radical) production, in a Fenton reaction from H<sub>2</sub>O<sub>2</sub> (Ishida et al., 1998; Jakob and  
405 Heber, 1996). In addition it has been reported that KCN inhibits also the catalase enzyme in  
406 intact chloroplasts of higher plants, which leads to enhanced production of H<sub>2</sub>O<sub>2</sub> (Forti and  
407 Gerola, 1977). Therefore, in contrast with GA, KCN would induce a much greater production  
408 of ROS and this could explain the marked difference in bleaching response. Overall,  
409 therefore this evidence supports a strong role for ROS in inducing bleaching (Lesser, 2011).  
410 Furthermore, KCN did not significantly enhance bleaching under thermal stress compared to  
411 26°C as the extent of bleaching was the same in all temperature treatments (Fig. 5), and no  
412 different to the extent of bleaching in nubbins exposed to 30°C and 31°C in the absence of  
413 any inhibitors. This suggests the inhibition caused by KCN at an optimal temperature (26°C)  
414 applied the same bleaching pressure as when thermal stress was applied at 30°C and 31°C,

415 regardless of whether KCN was present or absent. If our hypothesis is correct, that ROS is  
416 driving the bleaching process, then KCN at 26°C must produce the same degree of ROS as  
417 31°C in the absence of KCN, i.e. ROS production in the presence of KCN is saturating at  
418 26°C.

419

420 The concentration of KCN that has been used in our studies (20  $\mu\text{M}$ ) is comparable to that  
421 used in other experiments on the inhibition of the Calvin-Benson cycle in algal and coral  
422 bleaching studies (Wishnik and Lane, 1969; Sicher, 1984; Jones and Hoegh-Guldberg, 1999).  
423 The concentrations of KCN, which have been used to inhibit algal ascorbate peroxidase have  
424 traditionally been higher than here, viz 1 mM (Sigeoka et al., 2002). However, a structural  
425 study by Hill et al. (1997) showed that ascorbate peroxidase had a binding constant to the  
426 enzyme of  $K_d = 11.6 \mu\text{M}$  and it is entirely reasonable that ascorbate peroxidase was inhibited  
427 in our experiments.

428

#### 429 *Inhibition of PSII function*

430 The two inhibitors of the Calvin Cycle, GA and KCN, would be expected to have indirect  
431 effects on PSII through a limitation on electron transport and ROS production. GA has been  
432 shown to inhibit the PSII repair cycle (Takahashi and Murata, 2005) which could be induced  
433 by the suppression of D1 protein synthesis at the translation elongation step due to the  
434 accumulation of  $^1\text{O}_2$  in the absence of electron transfer towards  $\text{CO}_2$  as the final electron  
435 acceptor (Nishiyama et al., 2001; Nishiyama et al., 2004). In addition, the effect of  
436 superoxide could also contribute to the inhibition of D1 repair in the presence of GA  
437 (Takahashi and Murata, 2005). KCN is also expected to enhance  $^1\text{O}_2$  production due to over  
438 reduction of electron transport components at the acceptor side of PSII in the absence of  
439 electron flow towards the Calvin-Benson cycle, while the inhibitory effect of KCN on  
440 catalase (Forti and Gerola, 1977) would enhance production of  $\text{H}_2\text{O}_2$ , which is also an  
441 inhibitor of D1 protein synthesis, and therefore of the PSII repair cycle (Nishiyama et al.,  
442 2001). Our current findings obtained with the coral symbiosis provide further evidence for  
443 the differential effect of inhibiting the process of  $\text{CO}_2$  uptake by different inhibitors of the  
444 Calvin-Benson cycle reported earlier in other microalgae and higher plants.

445

446 In contrast to GA and KCN, enhanced temperatures may have a direct effect on one or more  
447 functions of PSII (Warner et al., 1999; Hill et al., 2011). In this study, PSII photochemical  
448 efficiency ( $F_V/F_M$ , Fig. 6) and the amplitude of FIC steps (Fig. 8) showed a temperature-



449 dependent decline even in the absence of inhibitors, with the 31°C treatment experiencing the  
450 greatest decrease in  $F_V/F_M$  and J, I and P steps. The initial decline in  $F_V/F_M$  and loss of  
451 variable fluorescence in FICs in the 26°C treatment in the absence of inhibitors indicates that  
452 the light intensity applied ( $600 \mu\text{mol photons m}^{-2} \text{s}^{-1}$ ) caused some photoinactivation of PSII.  
453 Prior to experimentation, corals were maintained in aquaria at  $100 \mu\text{mol photons m}^{-2} \text{s}^{-1}$  and  
454 we conclude that the 6 fold increase in irradiance was sufficient to lower photosynthetic  
455 efficiency in the absence of thermal stress. With the application of thermal stress, a greater  
456 loss of  $F_V/F_M$  and amplitude of J, I and P steps was found in all inhibitor treatments compared  
457 to the 26°C treatment, with photoinactivation only partially reversible in the absence of GA  
458 and KCN after 14 h of recovery in darkness. The decline in FIC amplitude was primarily the  
459 result of changes to the J step. This was visualised in Fig. S1 that shows the relative variable  
460 fluorescence. In the presence of GA or KCN, the non-reversible rise in the J step over time  
461 indicates a greater reduction of  $Q_A$  due to closure of PSII reaction centres (Strasser et al.,  
462 1995; Hill et al., 2004a; Ulstrup et al., 2005). The loss of variable fluorescence between the J  
463 and P steps (Fig. 9) matches with the greatly inhibited  $F_V/F_M$  values in the presence of GA by  
464 24 h in all 3 temperature treatments. The low  $F_V/F_M$  readings at 24 h indicate an almost  
465 complete loss of variable fluorescence, and by comparing the J:P ratio and  $F_V/F_M$ , we can  
466 conclude that the small variable fluorescence that remained was due to increases from the O  
467 to J phase. After the 3 ms time point in the FICs, no further change in fluorescence occurred.  
468 This indicates that there was still some minor capacity for reduction of  $Q_A$  to  $Q_A^-$  at this time  
469 point, but no potential for  $Q_B$  or plastoquinone (PQ) pool reduction (Strasser et al., 1995; Hill  
470 et al., 2004a). Together, these impacts to PSII function suggest that net PSII repair was able  
471 to partially counter photoinactivation when the Calvin-Benson cycle was still functional.  
472 However, exposure to GA and KCN prevented any net repair to PSII with no recovery of  
473  $F_V/F_M$  or FIC steps found following 14 h of darkness.

474

475 The elevated excitation pressure on PSII as a consequence of over-reduced  $Q_A$  can be judged  
476 from the OJIP fluorescence induction curves along with the data of functional absorption  
477 cross-sectional area of PSII ( $\sigma_{\text{PSII}}$ ). The negative correlations between the J:P ratio and  $\sigma_{\text{PSII}}$   
478 (Table 1) demonstrated how the development of over-reduced  $Q_A^-$  lead to a smaller PSII  
479 cross-sectional area, which is a potential photoprotective mechanism to reduce excitation  
480 pressure on PSII reaction centres (Falkowski and Owens, 1980; Gorbunov et al., 2001;  
481 Suggett et al., 2004). A similar response was observed in the green alga *Chlamydomonas*  
482 *reinhardtii*, where inhibition of Calvin-Benson cycle by GA triggered enhanced non-

483 photochemical quenching (NPQ) as a photoprotective mechanism (Takahashi and Murata,  
484 2005). Interestingly, the correlation between J:P and changes in  $\sigma_{\text{PSII}}$  in GA treatments was  
485 poor at 26°C but improved towards the 31°C heat treatments, indicating that the correlation  
486 between reduction state of  $Q_A$  and changes in cross-sectional area was more expressed when  
487 the heat stress was more severe during the GA treatment. Nevertheless, a clear tendency of  
488  $\sigma_{\text{PSII}}$  and J:P as a function of temperature could not be given. The fact that in the absence of  
489 inhibitors J:P was much smaller and no significant change in  $\sigma_{\text{PSII}}$  was observed, indicates  
490 that rapid changes in functional cross-sectional area of PSII is not the major photoprotective  
491 mechanism of *in hospite Symbiodinium*, which is in agreement with earlier findings (Lesser  
492 and Farrel, 2004; Hennige et al., 2011). Changes in  $\sigma_{\text{PSII}}$  becomes relevant only during the  
493 inhibitor treatments, when excitation pressure on PSII increases as a consequence of an over-  
494 reduced state of  $Q_A$  (elevated J:P ratio) that is triggered by impaired  $\text{CO}_2$  fixation via the  
495 Calvin-Benson cycle. Based on the data of  $\sigma_{\text{PSII}}$  and fluorescence induction curves, the effect  
496 of GA and KCN was similar, but not the same. The lack of correlation between over-reduced  
497  $Q_A^-$  and changes in  $\sigma_{\text{PSII}}$  at 26 and 30°C in the presence of GA, but the significant correlations  
498 at these temperatures in the presence of KCN suggests that mechanisms specific to each  
499 inhibitor might be responsible for the downregulation of photochemical efficiency and are  
500 unrelated to Calvin-Benson cycle activity. In the case of GA, loss of photochemical  
501 efficiency may be due to increased NPQ (Takahashi and Murata, 2005), from changes in the  
502 light harvesting antenna complexes (Gorbunov et al., 2001; Hill et al., 2012) or reaction  
503 centre inactivation (Hennige et al., 2011). Takahashi and Murata (2005) suggest that although  
504 NPQ increases in *Chlamydomonas sp.* in the presence of GA, the photochemical quenching  
505 was unaltered under this treatment, indicating that the reduction state of  $Q_A^-$  does result in  
506 engagement of the photoprotective processes in all cases. Although our observation in  
507 *Symbiodinium sp.* indicates that  $Q_A$  becomes reduced in the presence of GA based on the  
508 elevated J:P ratio (Fig. 9) a clear correlation between the amount of  $Q_A^-$  and the value of  $\sigma_{\text{PSII}}$   
509 cannot be given (Table 1), in agreement with the finding of Takahashi and Murata (2005).  
510 The effect of KCN appeared to be somewhat different, with a strong correlation found. In the  
511 presence of KCN the reduction state of  $Q_A$  can directly be linked to declined  $\sigma_{\text{PSII}}$ , possibly  
512 due to KCN blocking ascorbate peroxidase (APX). A recent study showed that APX deficient  
513 mutants of rice (*Oryza sativa*) exhibited enhanced excitation energy pressure on PSII due to  
514 the accumulation of hydrogen peroxide and hydroxyl radicals under light stress conditions  
515 (Caverzan et al., 2014). Although there is no similar detailed study available of the  
516 physiological impact of the absence of ascorbate peroxidase activity in *Symbiodinium*, we

517 propose that the differential response of KCN and GA is related to the additional inhibitory  
518 effect KCN has on APX activity and thereby strong correlation between reduction state of  
519 plastoquinone pool and  $\sigma_{\text{PSII}}$ .

520

521 The changes in  $F_V/F_M$  for control, GA and KCN were mirrored in the rates of net oxygen  
522 production (Fig. 7), except that instead of recovery at the 24 h time point in the absence of  
523 GA and KCN, oxygen production continued to decline, with the greatest loss in the 31°C  
524 treatment. While in this treatment PSII photosynthetic efficiency showed potential for  
525 recovery, photosynthetic oxygen production showed a significant decline in the thermally-  
526 treated corals (31°C) as considerable bleaching had occurred and the symbiont density and  
527 chlorophyll concentration per  $\text{cm}^2$  of coral skeleton declined (Fig. 5). The temperature-  
528 dependent reduction in  $\text{O}_2$  production in the light by GA and KCN indicates loss of  
529 photosynthetic electron transport which is confirmed by the  $F_V/F_M$  data. Interestingly  
530 however, there was often a large mismatch between  $F_V/F_M$  and the rate of oxygen production,  
531 particularly in the KCN treatments. Photochemical efficiency was retained in the presence of  
532 KCN in the 30°C and 31°C after 3 h of exposure, as well as at 26°C after 24 h. A similar  
533 result was seen in the absence of inhibitors after 24 h at 31°C. This indicates that although  
534 PSII is still functional when probed with a saturating pulse following dark adaptation, the  
535 electron transport chain and dark reactions are inhibited during illumination resulting in a  
536 greatly depressed rate of oxygen production compared to  $F_V/F_M$ . This suggests that while  
537 PSII experiences some level of damage, more severe inhibition is likely occurring at the site  
538 of the Calvin-Benson cycle under thermal stress. Alternatively, this mismatch could be  
539 related to the bleaching of nubbins which would affect oxygen production rates, but not  
540  $F_V/F_M$ , or an inhibition to the oxygen evolving complex that is more severe than damage to  
541 the PSII core complex (although this latter possibility is unlikely; see Hill and Ralph, 2008).

542

#### 543 *Inhibition of $\text{CO}_2$ fixation as a trigger of coral bleaching*

544 Considerable research effort has focussed on understanding the photosynthetic trigger that  
545 results in coral bleaching (Lesser, 2011). Here, we used chemical compounds (GA and KCN)  
546 known to inhibit the Calvin-Benson cycle to probe their effect on bleaching in coral nubbins  
547 exposed to three different temperature regimes. We found that while bleaching was not  
548 detected at 26°C in the presence of GA, an almost complete loss of photosynthetic function  
549 was found. This supports the conclusion that inhibition of photosynthetic  $\text{CO}_2$  fixation was  
550 not an immediate cause of bleaching in *P. damicornis*. The results from the KCN experiments

551 are in stark contrast to this with bleaching occurring in all treatment temperatures. We  
552 hypothesise that KCN-driven ROS production was the driver of the bleaching response.  
553 Bhagooli (2013) found bleaching did occur at the growth temperature of 26°C in *Stylophora*  
554 *pistillata* when CO<sub>2</sub> fixation was inhibited by GA. This difference between our study and  
555 Bhagooli (2013) may be due to, 1) the higher concentration of GA used in Bhagooli (2013; 5  
556 mM GA compared to 3 mM GA used in our study) which may have had additional impacts to  
557 the symbiosis or which may induce a more rapid and/or chronic response, or 2) due to the  
558 different coral species used; a factor which is believed to play an important role in  
559 determining the site of primary photosynthetic impairment during thermal bleaching (Buxton  
560 et al., 2012). Thus we suggest that in *P. damicornis* elevated ROS production from KCN  
561 exposure causes dysfunction to the symbiosis and results in bleaching. The suggestion that in  
562 coral bleaching KCN acts by inhibiting ascorbate peroxidase, thereby stimulating ROS  
563 production, needs further testing.  
564

565 **Materials and methods**

566

567 *Symbiodinium* cultures

568 The CS-156 *Symbiodinium* culture was obtained from the Commonwealth Scientific and  
569 Industrial Research Organisation (CSIRO) Australian National Algae Culture Collection, and  
570 grown in f/2 media at 25°C and 40  $\mu\text{mol photons m}^{-2} \text{s}^{-1}$ , with a light to dark ratio of 12:12 h.  
571 Measurements were performed on cultures with approximately 7  $\mu\text{g chlorophyll (a + c}_2\text{) mL}^{-1}$   
572 at 25°C.

573

574 *Coral specimens*

575 Four colonies of *Pocillopora damicornis* (Linnaeus) were collected from Heron Island  
576 lagoon, located on the southern Great Barrier Reef of Australia (151°55'E, 23°27'S) and  
577 transported to the University of Technology, Sydney where they were placed in recirculating  
578 artificial seawater at 26°C and 100  $\mu\text{mol photons m}^{-2} \text{s}^{-1}$ . Nubbins approximately 1 cm in  
579 length were broken off from each colony for subsequent use in experimental treatments 1-3  
580 days later.

581

582 *Inhibitor range finding trials*

583 Gross photosynthesis, dark respiration, maximum quantum yield ( $F_V/F_M$ ), chlorophyll  
584 fluorescence fast induction curves (FICs), chlorophyll and zooxanthellae density were  
585 measured as detailed below.

586

587 Initial experiments were performed on *Symbiodinium* cultures where temperature was kept  
588 constant during experimentation and irradiance applied for 8 h, followed by 12 h darkness  
589 and a further 12 h of light (40  $\mu\text{mol photons m}^{-2} \text{s}^{-1}$ ). Photosynthetic activity was assessed by  
590 measuring the so called OJIP transient of variable chlorophyll fluorescence during  
591 application of a 2 s saturating pulse (Strasser et al., 1995; Hill et al., 2004a).  $F_V/F_M$  was  
592 obtained by calculating  $(F_M - F_O)/F_M$ , where  $F_O$  and  $F_M$  represent the minimum fluorescence in  
593 dark adapted cells, and the maximal fluorescence yield under continuous saturating light,  
594 respectively. These measurements were performed using the FL-3000 Fluorometer which is  
595 designed to measure algal in suspension (Photon Systems Instruments, Brno, Czech  
596 Republic).

597

598 Following these concentration range finding tests on *Symbiodinium* cultures, *in hospite*  
599 *Symbiodinium* of *Pocillopora damicornis* were tested at 0, 1 and 5 mM GA and 0, 10 and 100  
600  $\mu\text{M}$  KCN. One nubbin from each of the four colonies was placed in individual 500 mL  
601 beakers filled with 250 mL of 0.2  $\mu\text{m}$  filtered seawater (FSW) and gently mixed during  
602 exposure to 600  $\mu\text{mol photons m}^{-2} \text{ s}^{-1}$  (white LED panels; IronHorse WLED80, Arlec,  
603 Blackburn, Australia).  $F_v/F_M$  was measured on a Mini-PAM fluorometer (Walz Effeltrich,  
604 Germany) after 10 mins of dark adaptation (0.8 s saturating pulse of  $>4500 \mu\text{mol photons m}^{-2}$   
605  $\text{s}^{-1}$ , gain = 8) at 0, 1 and 3 h. A 6 mm diameter glass fibre optic, connected to the Mini-PAM  
606 was used to measure the photosynthetic surface of the coral nubbins. Gross photosynthesis  
607 rates were measured using a temperature-controlled oxygen electrode cuvette (Rank,  
608 Bottisham, England) with a capacity of 3-5 mL and a Firesting optical oxygen sensor  
609 (PyroScience, Aachen, Germany).

610

#### 611 *Experimental protocol*

612 Nubbins of *P. damicornis* were placed in individual beakers as described above for 24 h. For  
613 the first 10 h, nubbins were exposed to 600  $\mu\text{mol photons m}^{-2} \text{ s}^{-1}$ , and then 14 h of darkness.  
614 During the first two hours of the light treatment, nubbins were ramped from 26°C to their  
615 experimental temperature treatments of 26°C (control), 30°C and 31°C. At the end of the  
616 light period (10 h mark), temperatures were gradually reduced to 26°C over 2 h and  
617 maintained at this temperature until 24 h. In each temperature treatment, four nubbins were  
618 exposed to seawater only (control), 3 mM GA, or 20  $\mu\text{M}$  KCN ( $n = 4$ ). At the 10 h mark, a  
619 100% water change (containing GA or KCN in the inhibitor treatments) was given to each  
620 nubbin.

621

622 Four nubbins were harvested at 0 h and another four at 24 h from each of the three  
623 temperature treatments and three inhibitor treatments for determination of symbiont density  
624 and chlorophyll *a* and *c*<sub>2</sub> concentration. Nubbins were placed in 15 mL of FSW and  
625 airbrushed to remove all coral tissue from the skeleton. The host and endosymbiont slurry  
626 was centrifuged at 1000 *g* for 10 mins and the supernatant discarded. The algal pellet was  
627 resuspended in 4 mL FSW and 100  $\mu\text{L}$  removed for symbiont counting on haemocytometer  
628 slides. Eight replicate counts were performed per sample to determine symbiont density. The  
629 remaining 3.9 mL was centrifuged again at 1000 *g* for 10 mins. The supernatant was  
630 discarded and the algal pellet was resuspended in 4 mL 90% acetone. 24 h later, the samples  
631 were centrifuged at 1000 *g* for 10 mins and the absorbance of the supernatant was measured

632 at 630 and 664 nm on a UV–Vis spectrophotometer (Shimadzu, USA). Chlorophyll *a* and *c*<sub>2</sub>  
633 concentrations were then determined by using the equations of Jeffrey and Humphrey (1975).  
634 Symbiont density and chlorophyll *a* and *c*<sub>2</sub> concentration were normalised to nubbin skeleton  
635 surface area which was determined using the paraffin wax technique (Stimson and Kinzie,  
636 1991). The total chlorophyll (*a* and *c*<sub>2</sub>) per symbiont cell was also calculated.

637

638 At 0, 2, 4, 7, 10 and 24 h,  $F_V/F_M$  of the *in hospite* symbionts was measured after 10 mins of  
639 dark adaptation using a Mini-PAM fluorometer (as described above), followed by functional  
640 absorption cross section of PSII ( $\sigma_{PSII}$ ) on a Fast<sup>Tracka</sup> II Fast Repetition Rate fluorometer  
641 (FRRf; Chelsea Technologies Group Ltd., West Molesey, Surrey). A pre-programmed single  
642 turnover acquisition was used for all measurements controlled by FASTPro software (version  
643 2.0). One measuring sequence included both saturation and relaxation phases. For saturation,  
644 60 x 1  $\mu$ s flashlets were given with the interval of 3  $\mu$ s between each flashlets. These settings  
645 resulted in a 240  $\mu$ s long measuring cycle for saturation. For relaxation, 50 x 1  $\mu$ s flashlets  
646 were given, initially with an interval of 100  $\mu$ s between each flashlet, which increased by  
647 10% in length for each consecutive flashlet interval. This resulted in a 116 ms long measuring  
648 cycle for the relaxation phase. To improve the signal-to-noise ratio, 4 sequences were  
649 averaged per acquisition, separated by 100 ms. The functional absorption cross-sectional area  
650 of photosystem II ( $\sigma_{PSII}$ ) was calculated using the FASTPro software according to the  
651 biophysical model of Kolber et al. (1998) and is expressed in  $\text{nm}^2 \cdot \text{quanta}^{-1}$  using the flash  
652 calibration factor for the instrument. The excitation wavelength was at  $470 \pm 20$  nm and the  
653 fluorescence emission was detected at  $685 \pm 10$  nm. The LED intensity and the  
654 photomultiplier voltage were adjusted according to the manufacturer's recommendations (see  
655 Oxborough et al., 2012) to optimize the  $F_0$  levels and the rate of PSII closure during the train  
656 of flashlets for the coral nubbins. Upon completion of  $\sigma_{PSII}$  determination, a double-  
657 modulation fluorometer (Photon Systems Instruments, FL-3300, Brno, Czech Republic) was  
658 used to measured fast induction curves (FICs) during a  $3700 \mu\text{mol photons m}^{-2} \text{ s}^{-1} 5 \text{ s}$  flash  
659 from red (640 nm) and blue (455 nm) LEDs (see Hill and Ralph, 2006). Chlorophyll  
660 fluorescence measurements were recorded every 10  $\mu$ s for the first 2 ms, every 1 ms up until  
661 1 s, and then every 500 ms up to 5 s. Curves were normalised to the O step ( $F_0$ ) at 0.05 ms  
662 (see Hill et al., 2004a). Relative variable fluorescence of the FICs was calculated using the  
663 formula  $[(F_t - F_0)/(F_M - F_0)]$  (Strasser et al., 1995; Hill et al., 2004a; Ulstrup et al., 2005). The  
664 ratio of the amplitude of the J step (inflection at 3 ms) to the P step ( $F_M$ ) was also calculated.  
665

666 At 0, 3, 10 and 24 h, the rate of gross primary production and respiration was determined  
667 using the Rank oxygen cuvette setup described earlier. Nubbins were placed in 5 mL of  
668 treatment seawater and held at the treatment temperature. They were exposed to 5 mins of  
669 darkness, followed by 5 mins of  $400 \mu\text{mol photons m}^{-2} \text{s}^{-1}$  from a quartz iodine light source.  
670 The rate of oxygen consumption or production was expressed per  $\text{cm}^2$  of nubbin surface area  
671 ( $\mu\text{mol O}_2 \text{h}^{-1} \text{cm}^{-2}$ ), determined as described above.

672

### 673 *Statistical analyses*

674 One way analysis of variance (ANOVA) tests were used to identify differences between  
675 inhibitor treatments, temperature treatments or changes over time in independent samples.  
676 Repeated-measures analysis of variance (rmANOVA) was applied in the analysis of samples  
677 that were measured continuously throughout the experiment. In cases where significant  
678 differences were detected, Tukey's post hoc comparisons identified the significantly different  
679 treatments. Pearson's correlation tests were used to detect significant correlations between  
680  $\sigma_{\text{PSII}}$  and the J:P ratio. A significance level of 0.05 was applied throughout these analyses and  
681 the Kolmogorov-Smirnov normality test and Levene's homogeneity of variance test were  
682 used to determine if assumptions of the parametric analyses were satisfied. The SPSS  
683 statistical software (version 21, 2012) was used to perform these analyses.

684



685 **Author Contributions**

686

687 R.H., M.S and AWDL wrote the paper and R.H., M.S., I.M., P.J.R. and A.W.D.L. designed  
688 the study. Experiments were performed by R.H., M.S., A.R., I.M. and A.W.D.L. All authors  
689 read and commented on the manuscript.

690

691 **Competing Interests**

692

693 No competing interests declared.

694

695 **Funding**

696

697 This work was supported by the Australian Research Council [grant number DP120101360 to

698 R.H.] and the Hungarian Granting Agency [grant number OTKA K-101433 to I.V. and A.R.].

699

700 **References**

701

702 **Al-Enezi, K. S., Alkhalaf, M. and Benov, L. T.** (2006) Glycolaldehyde induces growth  
703 inhibition and oxidative stress in human breast cancer cells. *Free Radical Biol. Med.* **40**,  
704 1144–1151.

705

706 **Barnes, D. J.** (1985) The effects of photosynthetic and respiratory inhibitors upon  
707 calcification in the staghorn coral *Acropora formosa*. *Proc. 5th Int. Coral Reef Congr.* **6**,  
708 161–166.

709

710 **Bhagooli, R.** (2013) Inhibition of Calvin-Benson cycle suppresses the repair of photosystem  
711 II in *Symbiodinium*: implications for coral bleaching. *Hydrobiologia* **714**, 183–190.

712

713 **Bishop, N. I. and Spikes, J. D.** (1955) Inhibition by cyanide of the photochemical activity of  
714 isolated chloroplasts. *Nature* **176**, 307–308.

715

716 **Buchel, C. and Garab, G.** (1995) Evidence for the operation of a cyanide-sensitive oxidase  
717 in chlororespiration in the thylakoids of the chlorophyll *c* containing alga *Pleurichloris*  
718 *meiringensis* (Xanthophyceae). *Planta* **19**, 69–75.

719

720 **Buxton, L., Takahashi, S., Hill, R. and Ralph, P. J.** (2012) Variability in the primary site  
721 of photosynthetic damage in *Symbiodinium* sp. (Dinophyceae) exposed to thermal stress. *J.*  
722 *Phycol.* **48**, 117–126.

723

724 **Caverzan, A., Bonifacio, A., Carvalho, F. E. L., Andrade, C. M. B., Passaia, G.,**  
725 **Schünemann, M., Maraschin, F. D. S., Martins, M. O., Teixeira, F. K., Rauber, R.,**  
726 **Margis, R., Silveira, J. A. G., Margis-Pinheiro, M.** (2014) The knockdown of chloroplastic  
727 ascorbate peroxidases reveals its regulatory role in the photosynthesis and protection under  
728 photo-oxidative stress in rice. *Plant Sci.* **214**, 74–87.

729

730 **Chalker, B. E. and Taylor, D. L.** (1975) Light-enhanced calcification and the role of  
731 oxidative phosphorylation in calcification of the coral *Acropora cervicornis*. *Proc. R. Soc.*  
732 *Lond. B* **190**, 323–331.

733

734 **Díaz-Almeyda, E., Thomé, P. E., El Hafidi, M. and Iglesias-Prieto, R.** (2011) Differential  
735 stability of photosynthetic membranes and fatty acid composition at elevated temperature in  
736 *Symbiodinium*. *Coral Reefs* **30**, 217–225.

737

738 **Falkowski P. G. and Owens T. G.** (1980) Light shade adaptation: two strategies in marine  
739 phytoplankton. *Plant Physiol.* **66**, 592–595.

740

741 **Forti, G. and Gerola, P.** (1977) Inhibition of photosynthesis by azide and cyanide and the  
742 role of oxygen in photosynthesis. *Plant Physiol.* **59**, 859–862.

743

744 **Gorbunov, M. Y., Kolber, Z. S., Lesser, M. P. and Falkowski, P. G.** (2001).  
745 Photosynthesis and photoprotection in symbiotic corals. *Limnol. Oceanogr.* **46**, 75–85.

746

747 **Hennige, S. J., McGinley, M. P., Grottoli, A. G. and Warner, M. E.** (2011)  
748 Photoinhibition of *Symbiodinium* spp. within the reef corals *Montastraea faveolata* and  
749 *Porites astreoides*: implications for coral bleaching. *Mar. Biol.* **158**, 2515–2526.

750

751 **Hill, A. P., Modi, S., Sutcliffe, M. J., Turner, D. D., Gilfoyle, D. J., Smith, T., Tam, B.**  
752 **M., Lloyd, E.** (1997) Chemical, spectroscopic and structural investigation of the substrate-  
753 binding site in ascorbate peroxidase. *Eur. J. Biochem.* **248**, 347–354.

754

755 **Hill, R., Brown, C. M., DeZeeuw, K., Campbell, D. A. and Ralph, P. J.** (2011) Increased  
756 rate of D1 repair in coral symbionts during bleaching is insufficient to counter accelerated  
757 photoinactivation. *Limnol. Oceanogr.* **56**, 139–146.

758

759 **Hill, R., Larkum, A. W. D., Frankart, C., Kühl, M. and Ralph, P. J.** (2004a) Loss of  
760 functional Photosystem II reaction centres in zooxanthellae of corals exposed to bleaching  
761 conditions: using fluorescence rise kinetics. *Photosynth. Res.* **82**, 59–72.

762

763 **Hill, R., Larkum, A. W. D., Prášil, O., Szabó, M., Kumar, V. and Ralph, P. J.** (2012)  
764 Light-induced dissociation of antenna complexes in the symbionts of scleractinian corals  
765 correlates with sensitivity to coral bleaching. *Coral Reefs* **31**, 963–975.

766

- 767 **Hill, R. and Ralph, P. J.** (2006) Photosystem II heterogeneity of *in hospite* zooxanthellae in  
768 scleractinian corals exposed to bleaching conditions. *Photochem. Photobiol.* **82**, 1577–1585.  
769
- 770 **Hill, R. and Ralph, P. J.** (2008) Impact of bleaching stress on the function of the oxygen  
771 evolving complex of zooxanthellae from scleractinian corals. *J. Phycol.* **44**, 299–310.  
772
- 773 **Hill, R., Schreiber, U., Gademann, R., Larkum, A. W. D., Kühl, M. and Ralph, P. J.**  
774 (2004b) Spatial heterogeneity of photosynthesis and the effect of temperature-induced  
775 bleaching conditions in three species of corals. *Mar. Biol.* **144**, 633–640.  
776
- 777 **Hill, R., Ulstrup, K. E. and Ralph, P. J.** (2009) Temperature induced changes in thylakoid  
778 membrane thermostability of cultured, freshly isolated and expelled zooxanthellae from  
779 scleractinian corals. *Bull. Mar. Sci.* **85**, 223–244.  
780
- 781 **Hoegh-Guldberg, O.** (1999) Climate change, coral bleaching and the future of the world's  
782 coral reefs. *Mar. Freshwater Res.* **50**, 839–866.  
783
- 784 **Hoegh-Guldberg, O., Mumby, P. J., Hooten, A. J., Steneck, R. S., Greenfield, P.,**  
785 **Gomez, E., Harvell, C. D., Sale, P. F., Edwards, A. J., Caldeira, K. et al.** (2007) Coral  
786 reefs under rapid climate change and ocean acidification. *Science* **318**, 1737–1742.  
787
- 788 **Hoogenboom, M. O., Campbell, D. A., Beraud, E., DeZeeuw, K. and Ferrier Pagès, C.**  
789 (2012) Effects of light, food availability and temperature stress on the function of  
790 photosystem II and photosystem I of coral symbionts. *PLoS One* **7**, e30167.  
791
- 792 **Iglesias-Prieto, R.** (1997) Temperature-dependent inactivation of photosystem II in  
793 symbiotic dinoflagellates. In *Proceedings of the 8th International Coral Reef Symposium*.  
794 (ed. H. A. Lessios and I. G. Macintyre), pp. 1313–1318. Panama: Smithsonian Tropical  
795 Research Institute.  
796
- 797 **IPCC** (2007) Climate Change 2007: synthesis Report. Contribution of Working Groups I, II  
798 and III to the Fourth Assessment Report of the Intergovernmental Panel on Climate Change,  
799 IPCC, Geneva.  
800

- 801 **Ishida, H., Shimizu, S., Makino, A. and Mae, T.** (1998) Light-dependent fragmentation of  
802 the large subunit of ribulose-1,5-bisphosphate carboxylase/oxygenase in chloroplasts isolated  
803 from wheat leaves. *Planta* **204**, 305–309.
- 804
- 805 **Jakob, B. and Heber, U.** (1996) Photoproduction and detoxification of hydroxyl radicals in  
806 chloroplasts and leaves and relation to photoinactivation of photosystems I and II. *Plant Cell*  
807 *Physiol.* **37**, 629–635.
- 808
- 809 **Jeffrey, S. W. and Humphrey, G. F.** (1975) New spectrophotometric equations for  
810 determining chlorophylls *a*, *b*, *c*<sub>1</sub> and *c*<sub>2</sub> in higher plants, algae and natural phytoplankton.  
811 *Biochemie und Physiologie der Pflanzen* **167**, 191–194.
- 812
- 813 **Jones, R. J. and Hoegh-Guldberg, O.** (1999) Effects of cyanide on coral photosynthesis:  
814 implications for identifying the cause of coral bleaching and for assessing the environmental  
815 effects of cyanide fishing. *Mar. Ecol. Prog. Ser.* **177**, 83–91.
- 816
- 817 **Jones, R. J., Hoegh-Guldberg, O., Larkum, A. W. D. and Schreiber, U.** (1998)  
818 Temperature-induced bleaching of corals begins with impairment of the CO<sub>2</sub> fixation  
819 metabolism in zooxanthellae. *Plant Cell Environ.* **21**, 1219–1230.
- 820
- 821 **Jones, R. J. and Steven A. L.** (1997) Effects of cyanide on corals in relation to cyanide  
822 fishing on reefs. *Mar. Freshwater Res.* **48**, 517–522.
- 823
- 824 **Jones, R. J., Ward, S., Yang, A. A. and Hoegh-Guldberg, O.** (2000) Changes in quantum  
825 efficiency of photosystem II of symbiotic dinoflagellates of corals after heat stress, and of  
826 bleached corals sampled after the 1998 Great Barrier Reef mass bleaching event. *Mar.*  
827 *Freshwater Res.* **50**, 839–866.
- 828
- 829 **Kolber, Z. S., Prasil, O. and Falkowski, P. G.** (1998) Measurements of variable chlorophyll  
830 fluorescence using fast repetition rate techniques: defining methodology and experimental  
831 protocols. *Biochim. Biophys. Acta* **1367**, 88–106.
- 832
- 833 **Leggat, W., Whitney, S. and Yellowlees, D.** (2004) Is coral bleaching due to the instability  
834 of the zooxanthellae dark reactions? *Symbiosis* **37**, 137–153.

835

836 **Lesser, M. P.** (2011) Coral bleaching: causes and mechanisms. In: *Coral reefs: an ecosystem*  
837 *in transition* (ed. Z. Dubinsky and N. Stambler), pp 405-419. Dordrecht: Springer.

838

839 **Lesser, M. P. and Farrell, J. H.** (2004) Exposure to solar radiation increases damage to both  
840 host tissues and algal symbionts of corals during thermal stress. *Coral Reefs* **23**, 367–377.

841

842 **Lilley, R., Ralph, P. J. and Larkum, A. W. D.** (2010) The determination of activity of the  
843 enzyme Rubisco in cell extracts of the dinoflagellate alga *Symbiodinium* sp. by manganese  
844 chemiluminescence and its response to short-term thermal stress of the alga. *Plant Cell*  
845 *Environ.* **33**, 995–1004.

846

847 **Loya, Y., Sakai, K., Yamazato, K., Nakano, Y., Sambali, H. and van Woesik, R.** (2001)  
848 Coral bleaching: the winners and the losers. *Ecol. Lett.* **4**, 122–131.

849

850 **Marshall, P. A. and Baird, A. H.** (2000) Bleaching of corals on the Great Barrier Reef:  
851 Differential susceptibilities among taxa. *Coral Reefs* **19**, 155–163.

852

853 **Miller, A. G. and Canvin, D. T.** (1989) Glycolaldehyde inhibits CO<sub>2</sub> fixation in the  
854 cyanobacterium *Synechococcus* UTEX 625 without inhibiting the accumulation of inorganic  
855 carbon or the associated quenching of chlorophyll *a* fluorescence. *Plant Physiol.* **91**, 1044–  
856 1049.

857

858 **Nishiyama, Y., Allakhverdiev, S. I., Yamamoto, H. and Hayashi, H.** (2004) Singlet  
859 oxygen inhibits the repair of Photosystem II by suppressing the translation elongation of the  
860 D1 protein in *Synechocystis* sp. PCC 6803. *Biochemistry* **43**, 11321–11330.

861

862 **Nishiyama, Y., Yamamoto, H., Allakhverdiev, S. I., Inaba, H., Yokota, A. and Murata,**  
863 **N.** (2001) Oxidative stress inhibits the repair of photodamage to the photosynthetic  
864 machinery. *EMBO J.* **20**, 5587–5594.

865

866 **Oxborough, K., Moore, C. M., Suggett, D. J., Lawson, T., Chan, H. G. and Geider, R. J.**  
867 (2012) Direct estimation of functional PSII reaction center concentration and PSII electron



- 868 flux on a volume basis: a new approach to the analysis of Fast Repetition Rate fluorometry  
869 (FRRf) data. *Limnol. Oceanogr. Methods* **10**, 142–154.
- 870
- 871 **Robison, J. D. and Warner, M. E.** (2006) Differential impacts of photoacclimation and  
872 thermal stress on the photobiology of four different phylotypes of *Symbiodinium*  
873 (Pyrrhophyta). *J. Phycol.* **42**, 568–579.
- 874
- 875 **Salon, C., Li, Q. and Canvin, D. T.** (1998) Glycolaldehyde inhibition of CO<sub>2</sub> transport in  
876 the cyanobacterium *Synechococcus* UTEX 625. *Canadian J. Bot.* **76**, 1–11.
- 877
- 878 **Sicher, R. C.** (1984) Glycolaldehyde inhibition of photosynthetic carbon assimilation by  
879 isolated chloroplasts and protoplasts. In *Advances in Photosynthesis Research* (ed. C.  
880 Sybesma), vol 3, pp 413–416. The Hague: W. Junk.
- 881
- 882 **Sigeoka, S., Ishikawa, T., Tamoi, M., Miyagawa, Y., Takeda, T., Yabuta, Y. and**  
883 **Yoshimura, K.** (2002) Regulation and function of ascorbate peroxidase isoenzymes. *J. Exp.*  
884 *Bot.* **53**, 1305–1319.
- 885
- 886 **Smith, D. J., Suggett, D. J. and Baker, N. R.** (2005) Is photoinhibition of zooxanthellae  
887 photosynthesis the primary cause of thermal bleaching in corals? *Global Change Biol.* **11**, 1–  
888 11.
- 889
- 890 **Stimson, J. and Kinzie, R. A.** (1991) The temporal pattern and rate of release of  
891 zooxanthellae from the reef coral *Pocillopora damicornis* (Linnaeus) under nitrogen-enriched  
892 and control conditions. *J. Exp. Mar. Biol. Ecol.* **153**, 63–74.
- 893
- 894 **Strasser, R. J., Srivastava, A. and Govindjee** (1995) Polyphasic chlorophyll *a* fluorescence  
895 transient in plants and cyanobacteria. *Photochem. Photobiol.* **61**, 32–42.
- 896
- 897 **Suggett, D. J., MacIntyre, H. L. and Geider R. J.** (2004) Evaluation of biophysical and  
898 optical determinations of light absorption by photosystem II in phytoplankton. *Limnol.*  
899 *Oceanogr. Methods* **2**, 316–332.
- 900

- 901 **Takahashi, S. and Murata, N.** (2005) Interruption of the Calvin-Benson cycle inhibits the  
902 repair of photosystem II from photodamage. *Biochim. Biophys. Acta (BBA) Bioenergetics*  
903 **1708**, 352–361.
- 904
- 905 **Takahashi, S., Whitney, S. M. and Badger, M. R.** (2009) Different thermal sensitivity of  
906 the repair of photodamaged photosynthetic machinery in cultured Symbiodinium species.  
907 *Proc. Natl. Acad. Sci. U. S. A.* **106**, 3237–3242.
- 908
- 909 **Takahashi, S., Whitney, S., Itoh, S., Maruyama, T. and Badger, M.** (2008) Heat stress  
910 causes inhibition of the *de novo* synthesis of antenna proteins and photobleaching in cultured  
911 *Symbiodinium*. *Proc. Natl. Acad. Sci. U. S. A.* **105**, 4203–4208.
- 912
- 913 **Tchernov, D., Gorbunov, M. Y., de Vargas, C., Yadav, S. N., Milligan, A. J., Haggblom,**  
914 **M. and Falkowski, P. G.** (2004) Membrane lipids of symbiotic algae are diagnostic of  
915 sensitivity to thermal bleaching in corals. *Proceed Proc. Natl. Acad. Sci. U. S. A.* **101**, 13531–  
916 13535.
- 917
- 918 **Tolleter, D., Seneca, F. O., DeNofrio, J. C., Krediet, C. J., Palumbi, S. R., Pringle, J. R.**  
919 **and Grossman, A. R.** (2013) Coral bleaching independent of photosynthetic activity. *Curr.*  
920 *Biol.* **23**, 1782–1786.
- 921
- 922 **Ulstrup, K. E., Hill, R. and Ralph, P. J.** (2005) Photosynthetic impact of hypoxia on *in*  
923 *hospite* zooxanthellae in the scleractinian coral *Pocillopora damicornis*. *Mar. Ecol. Prog.*  
924 *Ser.* **286**, 125–132.
- 925
- 926 **Warner, M. E., Fitt, W. K. and Schmidt, G. W.** (1999) Damage to Photosystem II in  
927 symbiotic dinoflagellates: A determinant of coral bleaching. *Proc. Natl. Acad. Sci. U. S. A.*  
928 **96**, 8007–8012.
- 929
- 930 **Whittingham, C. P.** (1952) Inhibition of photosynthesis by cyanide. *Nature* **169**, 838–839.
- 931
- 932 **Wishnik, M. and Lane, M. D.** (1969) Inhibition of ribulose diphosphate carboxylase by  
933 cyanide inactive ternary complex of enzyme ribulose diphosphate and cyanide. *J. Biol. Chem.*  
934 **244**, 55–59.



936 **Tables**

937

938 Table 1: Pearson correlation coefficients (r) between the J:P ratio and  $\sigma_{PSII}$  over time for the  
 939 control, GA and KCN treatments at 26, 30 and 31°C. Significant negative correlations (where  
 940  $P < 0.05$ , asterisks) indicate that the reduced state of  $Q_A$ , signified by a high J:P ratio, resulted  
 941 in a decrease in the cross-sectional area of photosynthetic light-harvesting antenna.

942

|         | Control |       |        | GA     |        |        | KCN    |        |        |
|---------|---------|-------|--------|--------|--------|--------|--------|--------|--------|
|         | 26°C    | 30°C  | 31°C   | 26°C   | 30°C   | 31°C   | 26°C   | 30°C   | 31°C   |
| r       | 0.365   | 0.363 | -0.096 | -0.671 | -0.851 | -0.944 | -0.979 | -0.955 | -0.957 |
| P-value | 0.477   | 0.480 | 0.856  | 0.215  | 0.967  | 0.016* | 0.001* | 0.003* | 0.003* |

943

944

945 **Figure legends**

946

947 Fig. 1:  $F_V/F_M$  of cultured *Symbiodinium* in the presence of A) GA (0-10 mM) and B) KCN  
 948 (0-100  $\mu\text{M}$ ) during 8 h of exposure to 40  $\mu\text{mol photons m}^{-2} \text{s}^{-1}$ , followed by 12 h darkness  
 949 and a further 12 h light. The white bars indicate periods of light and the grey bars indicate  
 950 darkness. Averages  $\pm$  s.d.m. ( $n = 3-6$ ).

951

952 Fig. 2: Double normalised fast induction curves (FICs) showing relative variable fluorescence  
 953  $[(F_t - F_0)/(F_M - F_0)]$  of cultured *Symbiodinium* in the presence of GA (0, 1, 3 and 5 mM; A,B)  
 954 and KCN (0, 10 and 20  $\mu\text{M}$ ; C,D) after 3 min exposure to inhibitors (A,C) and after a further  
 955 5 h exposure to 40  $\mu\text{mol photons m}^{-2} \text{s}^{-1}$  (B,D). The control 0 h measurements are also shown  
 956 for comparison with the FICs from 5 h (B,D). Averages shown ( $n = 5$ ).

957

958 Fig. 3:  $F_V/F_M$  of *in hospite* symbionts of *Pocillopora damicornis* exposed to (A) 0, 1 and 5  
 959 mM GA and (B) 0, 10 and 100  $\mu\text{M}$  KCN, after 0, 1 and 3 h at 26°C and under 250  $\mu\text{mol}$   
 960  $\text{photons m}^{-2} \text{s}^{-1}$ . Averages  $\pm$  s.e.m. ( $n = 4$ ).

961

962 Fig. 4: Gross photosynthesis and respiration rate ( $\mu\text{mol O}_2 \text{h}^{-1} \text{cm}^{-2}$ ) in *Pocillopora*  
 963 *damicornis* in the control (A; no inhibitors), in presence of 1 mM and 5 mM GA (B), and in  
 964 the presence of 10  $\mu\text{M}$  and 100  $\mu\text{M}$  KCN (C), after 0 h (black bars), 1 h (grey bars) and 3 h  
 965 (white bars) of exposure. Averages  $\pm$  s.e.m. ( $n = 4$ ).

966

967 Fig. 5: Symbiont density and chlorophyll concentration in *P. damicornis*. Symbiont density  
 968 ( $\times 10^6 \text{cm}^{-2}$ ) (A), chlorophyll *a* ( $\mu\text{g cm}^{-2}$ ) (B), chlorophyll *c*<sub>2</sub> ( $\mu\text{g cm}^{-2}$ ) (C), and pg of total  
 969 chlorophyll per cell (D). Values were taken at 0 h and 24 h in each of the 3 inhibitor  
 970 treatments (control, GA and KCN) at 26°C (black bars), 30°C (grey bars) and 31°C (white  
 971 bars). Averages  $\pm$  s.e.m. ( $n = 4$ ).

972

973 Fig. 6:  $F_V/F_M$  of *Pocillopora damicornis* in the absence of any inhibitor (control; A), in the  
 974 presence of 3 mM GA (B) and in the presence of 20  $\mu$ M KCN (C) at 26°C (black circles),  
 975 30°C (grey circles) and 31°C (white circles). Temperatures were ramped from 26°C to  
 976 treatment temperature over the first 2 h of the experiment and corals exposed to 600  $\mu$ mol  
 977 photons  $m^{-2} s^{-1}$  for the initial 10 h (white bars). At the 10 h time point, all corals were given a  
 978 14 h recovery period at 26°C in darkness (grey bars). Averages  $\pm$  s.e.m. ( $n = 4$ ).

979

980 Fig. 7: Oxygen production (net primary production; left side of figure) and respiration rate  
 981 (right side of figure) in  $\mu$ mol  $O_2 h^{-1} cm^{-2}$  in *Pocillopora damicornis* in the absence of any  
 982 inhibitor (control; A), in the presence of 3 mM GA (B) and in the presence of 20  $\mu$ M KCN  
 983 (C) at 26°C (black bars), 30°C (grey bars) and 31°C (white bars). Temperatures were ramped  
 984 from 26°C to treatment temperature over the first 2 h of the experiment. At the 10 h time  
 985 point, all corals were given a 14 h recovery period at 26°C. Corals were exposed to 600  $\mu$ mol  
 986 photons  $m^{-2} s^{-1}$  for the initial 10 h and then 14 h of darkness. Averages  $\pm$  s.e.m. ( $n = 4$ ).

987

988 Fig. 8: Fast induction curves (FICs) of *Pocillopora damicornis* in the absence of any inhibitor  
 989 (control; A-C), in the presence of 3 mM GA (D-F) and in the presence of 20  $\mu$ M KCN (G-I)  
 990 at 26°C (A,D,G), 30°C (B,E,H) and 31°C (C,F,I). Averages shown ( $n = 4$ ).

991

992 Fig. 9: J:P ratio of FICs in *Pocillopora damicornis* in the absence of any inhibitor (control;  
 993 A), in the presence of 3 mM GA (B) and in the presence of 20  $\mu$ M KCN (C) at 26°C (black  
 994 circles), 30°C (grey squares) and 31°C (white triangles). Temperatures were ramped from  
 995 26°C to treatment temperature over the first 2 h of the experiment and corals exposed to 600  
 996  $\mu$ mol photons  $m^{-2} s^{-1}$  for the initial 10 h (white bar). At the 10 h time point, all corals were  
 997 given a 14 h recovery period at 26°C in darkness (grey bar). Averages  $\pm$  s.e.m. ( $n = 4$ ).

998 Values close to 1 indicate J=P.

999

1000 Fig. 10: Functional absorption cross section of PSII ( $\sigma_{PSII}$ ) of *Pocillopora damicornis* in the  
 1001 absence of any inhibitor (control; A), in the presence of 3 mM GA (B) and in the presence of  
 1002 20  $\mu$ M KCN (C) at 26°C (black circles), 30°C (grey circles) and 31°C (white circles).

1003 Temperatures were ramped from 26°C to treatment temperature over the first 2 h of the  
1004 experiment and corals exposed to 600  $\mu\text{mol photons m}^{-2} \text{ s}^{-1}$  for the initial 10 h (white bars).  
1005 At the 10 h time point, all corals were given a 14 h recovery period at 26°C in darkness (grey  
1006 bars). Averages  $\pm$  s.e.m. ( $n = 4$ ).

1007

1008 Supplementary material

1009

1010 Fig. S1: Double normalised fast induction curves (FICs) showing relative variable  
1011 fluorescence  $[(F_t - F_0)/(F_M - F_0)]$  of *Pocillopora damicornis* in the absence of any inhibitor  
1012 (control; A-C), in the presence of 3 mM GA (D-F) and in the presence of 20  $\mu$ M KCN (G-I)  
1013 at 26°C (A,D,G), 30°C (B,E,H) and 31°C (C,F,I). Only the 0-10 h time points are shown. The  
1014 24 h GA time point had many values close to zero resulting in excessive noise in the relative  
1015 variable fluorescence calculation. Averages shown ( $n = 4$ ).

1016



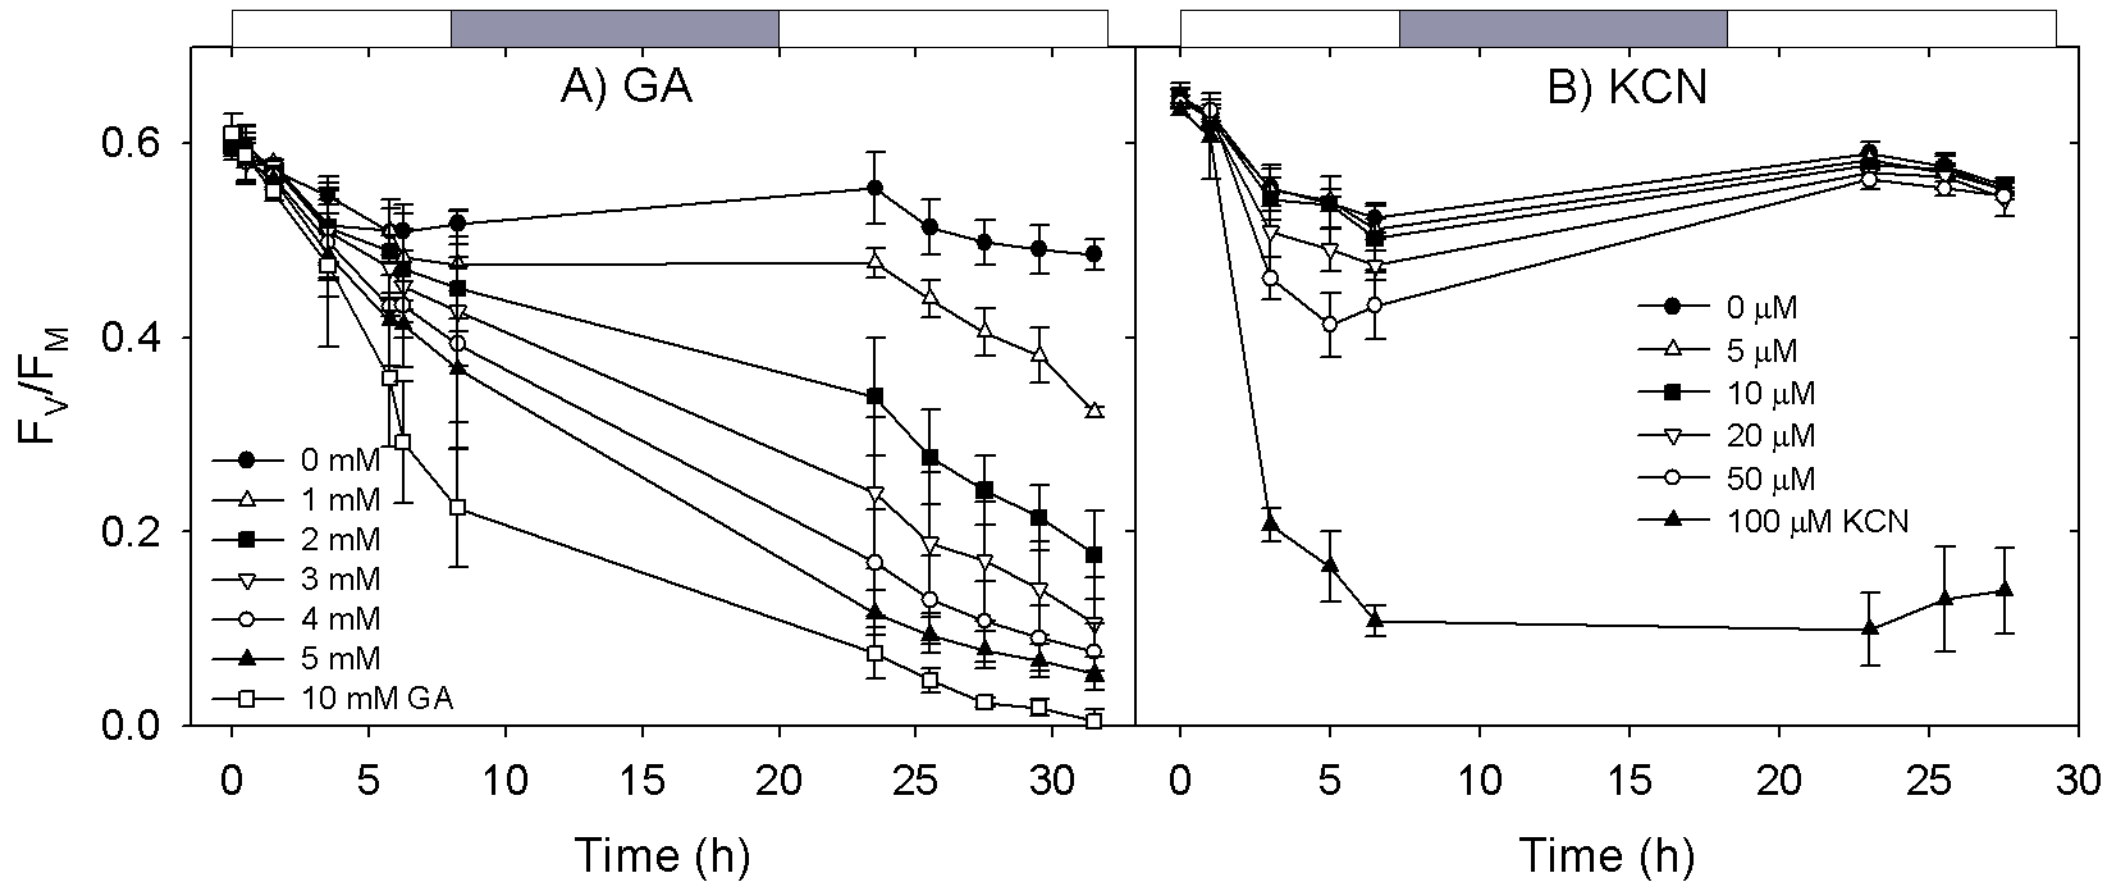

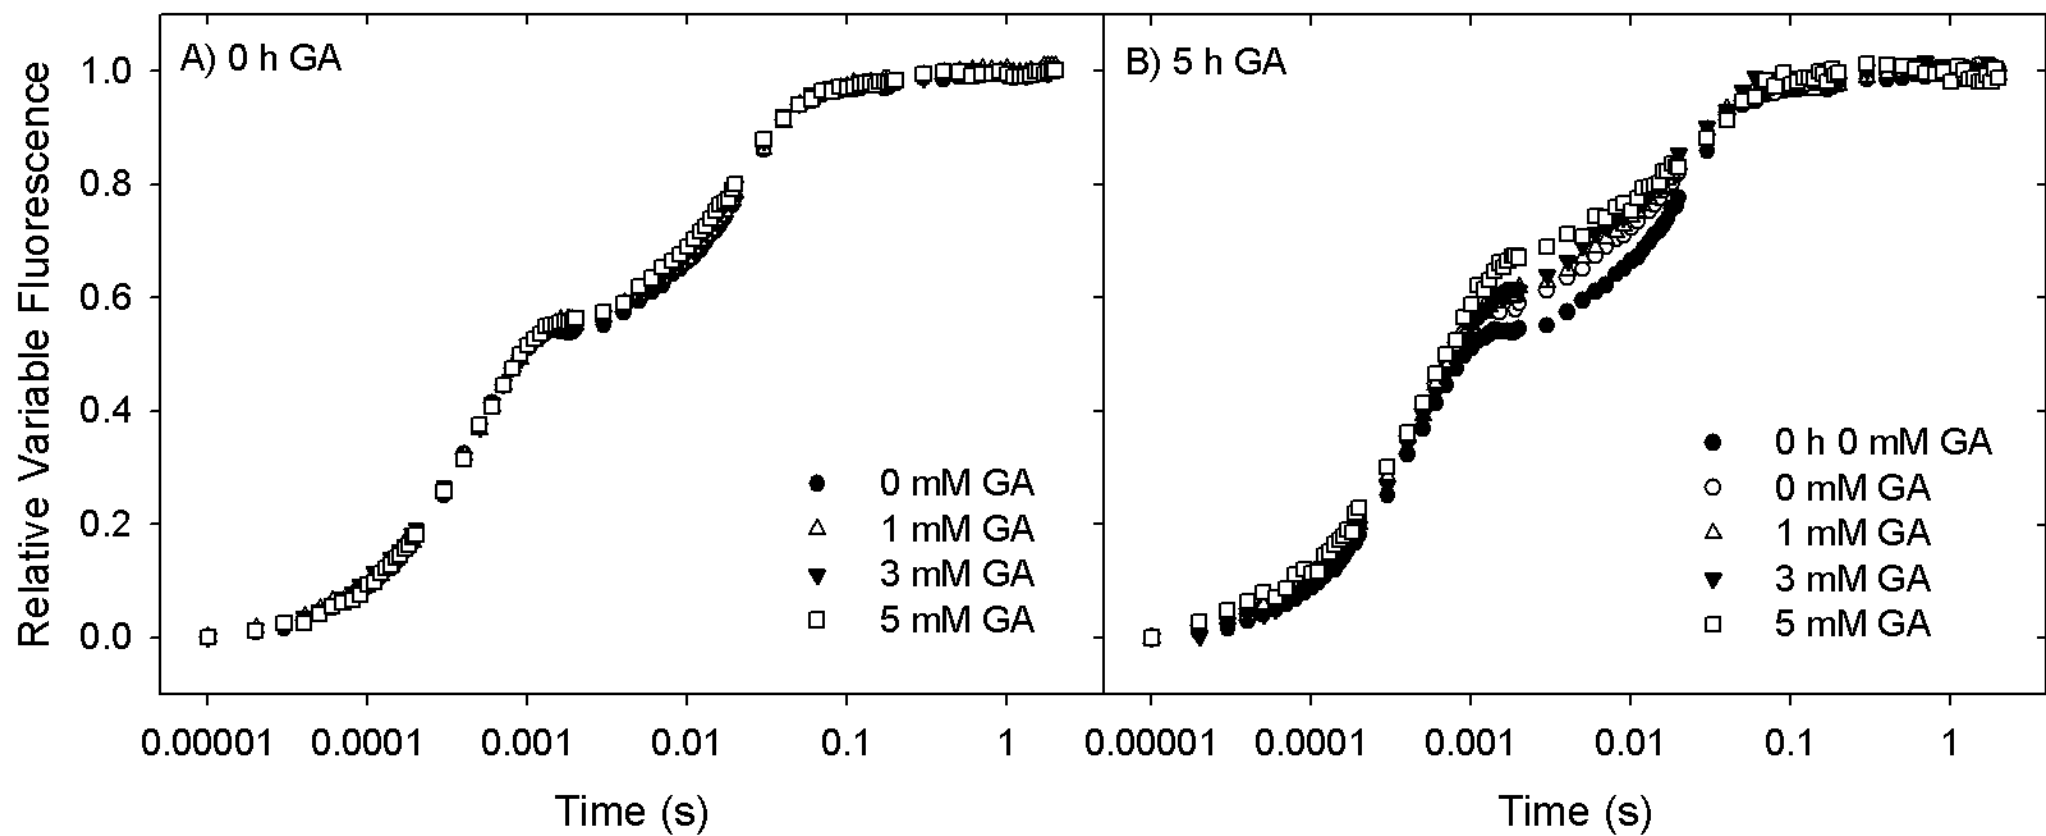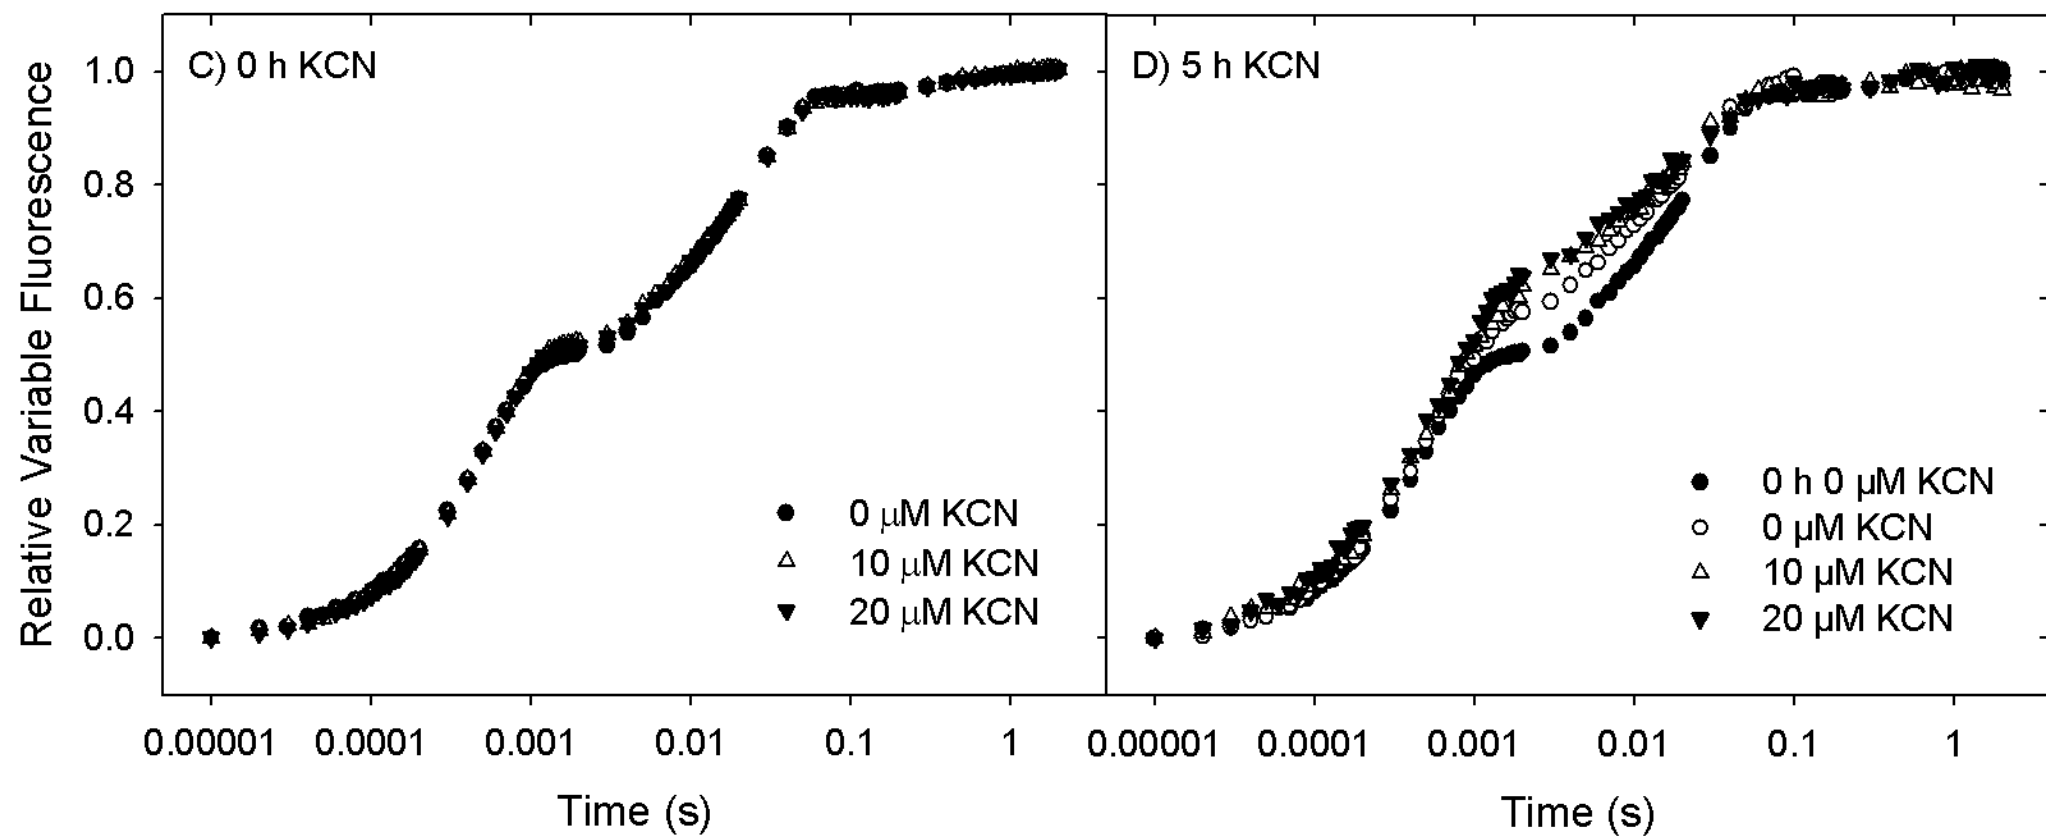

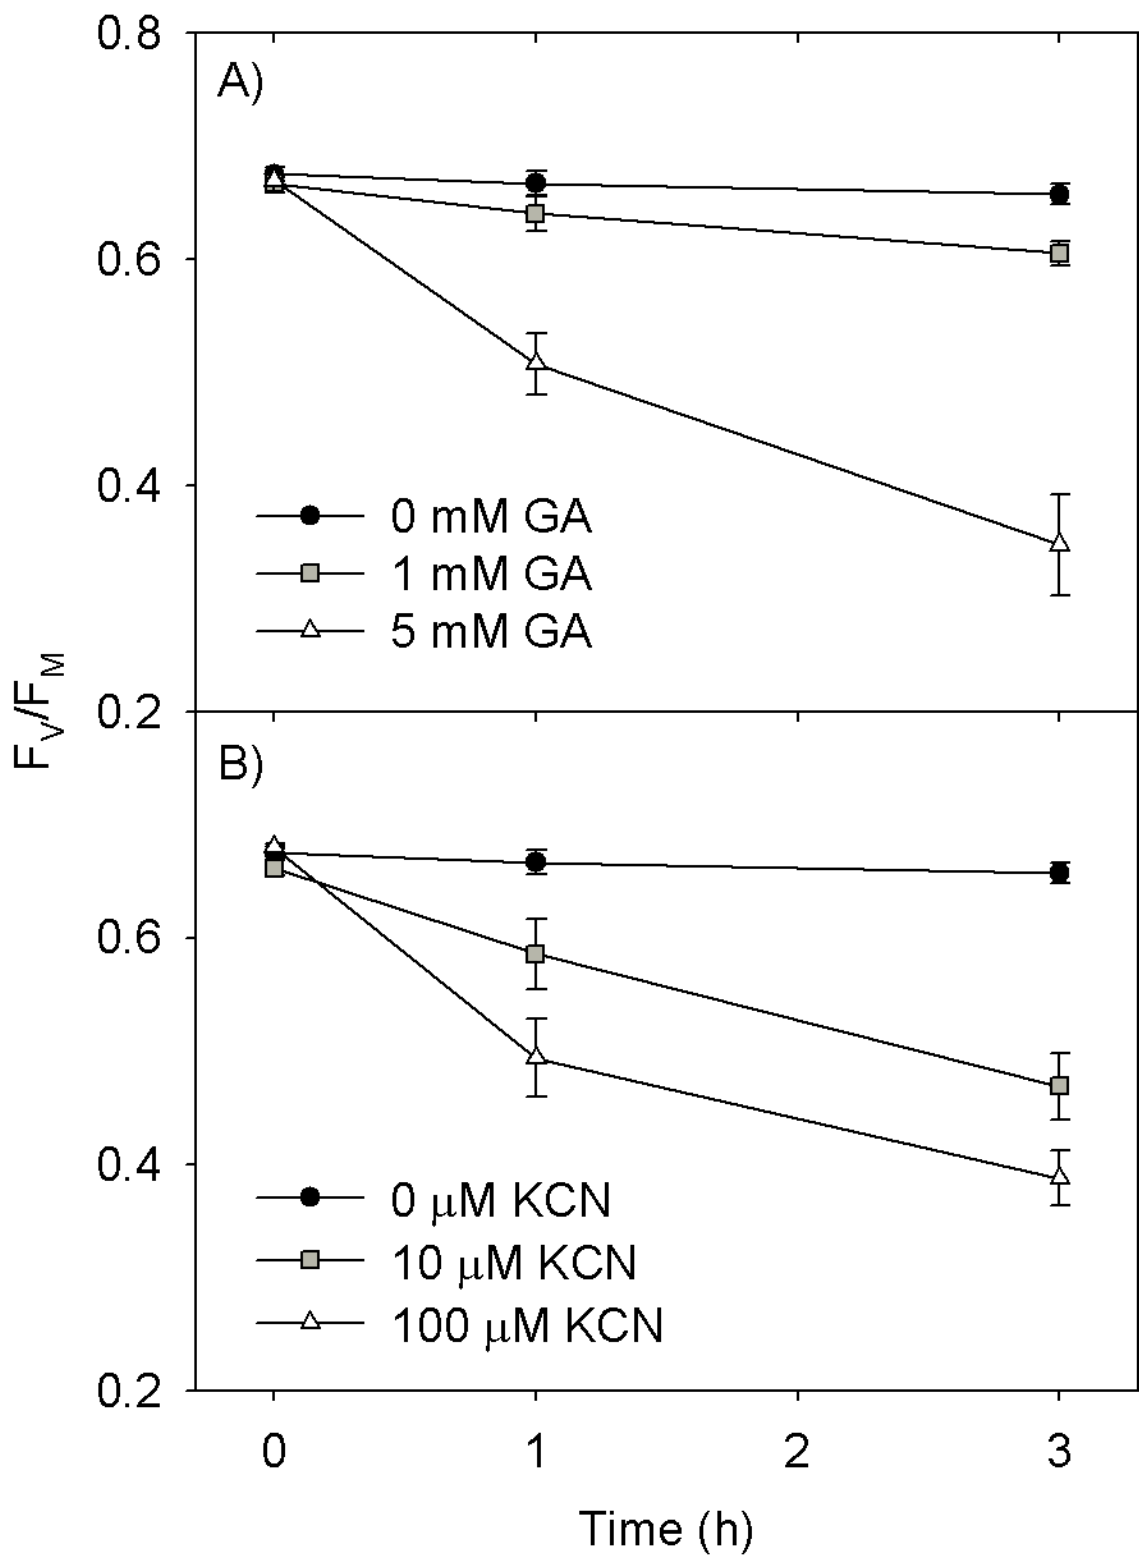

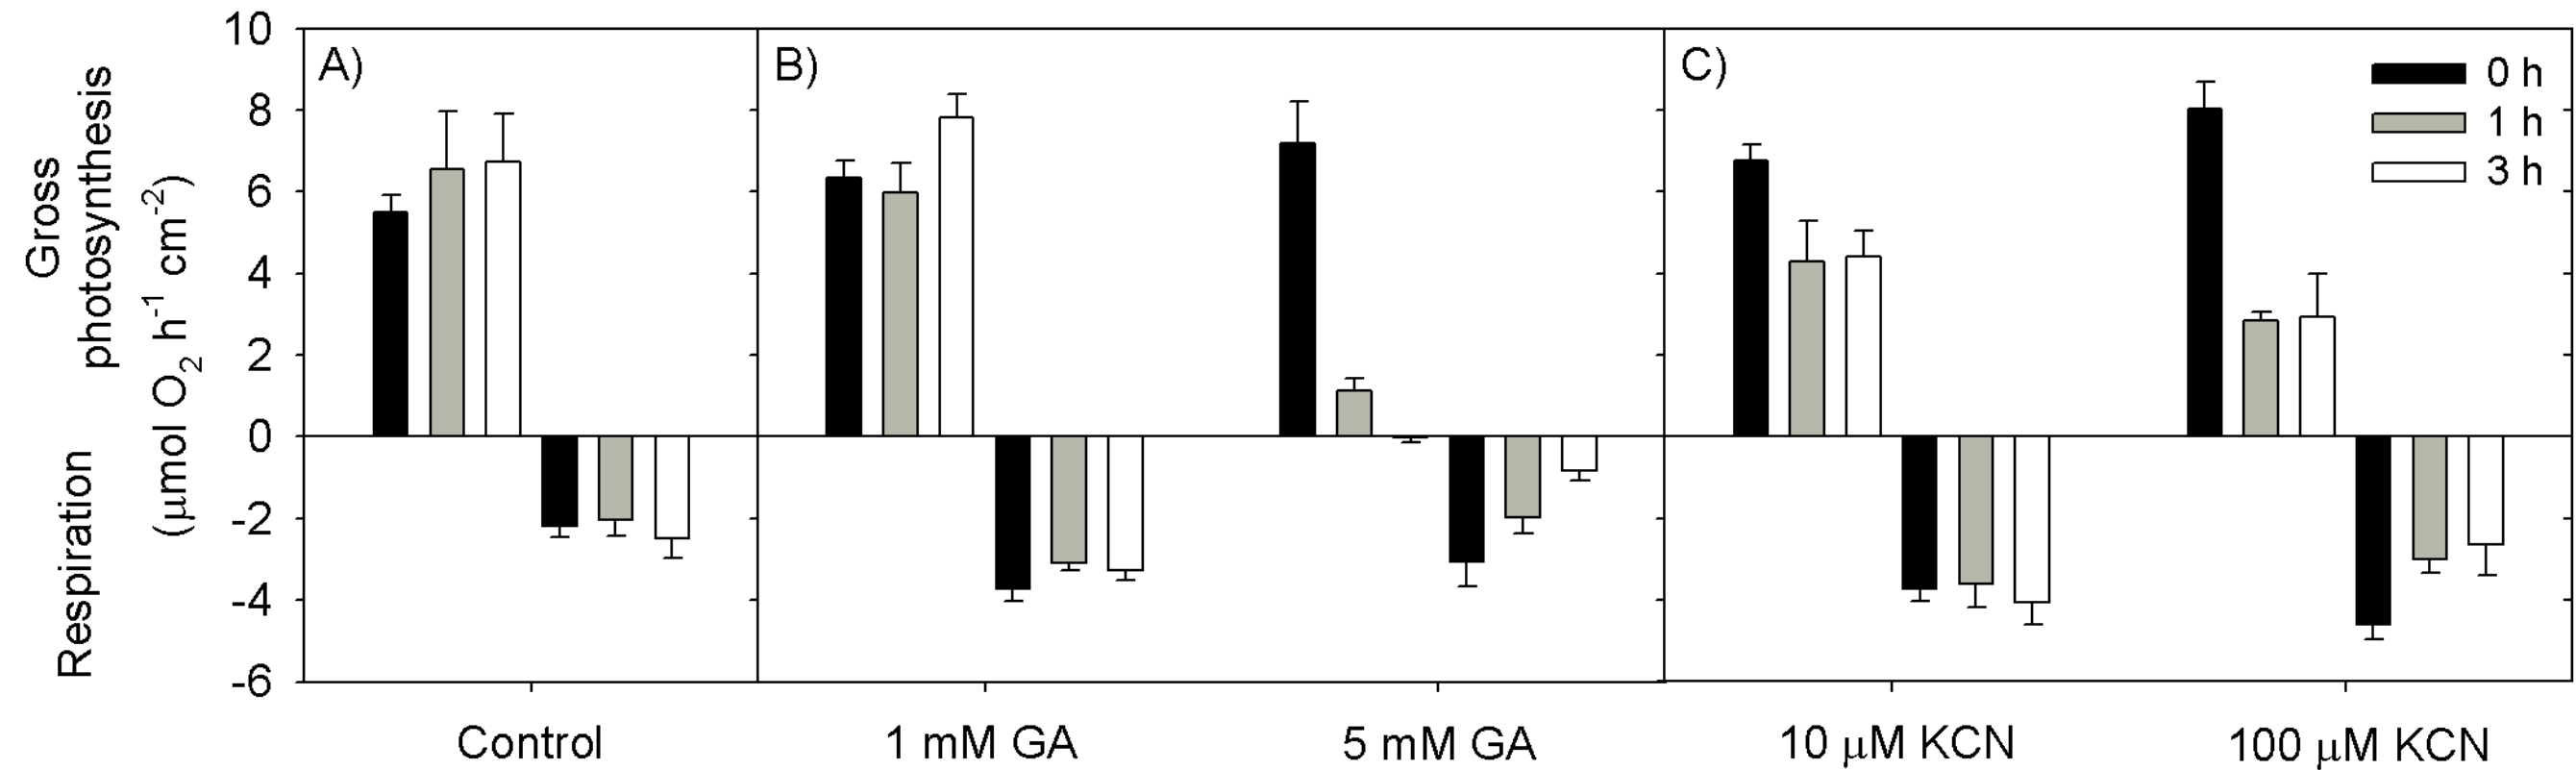

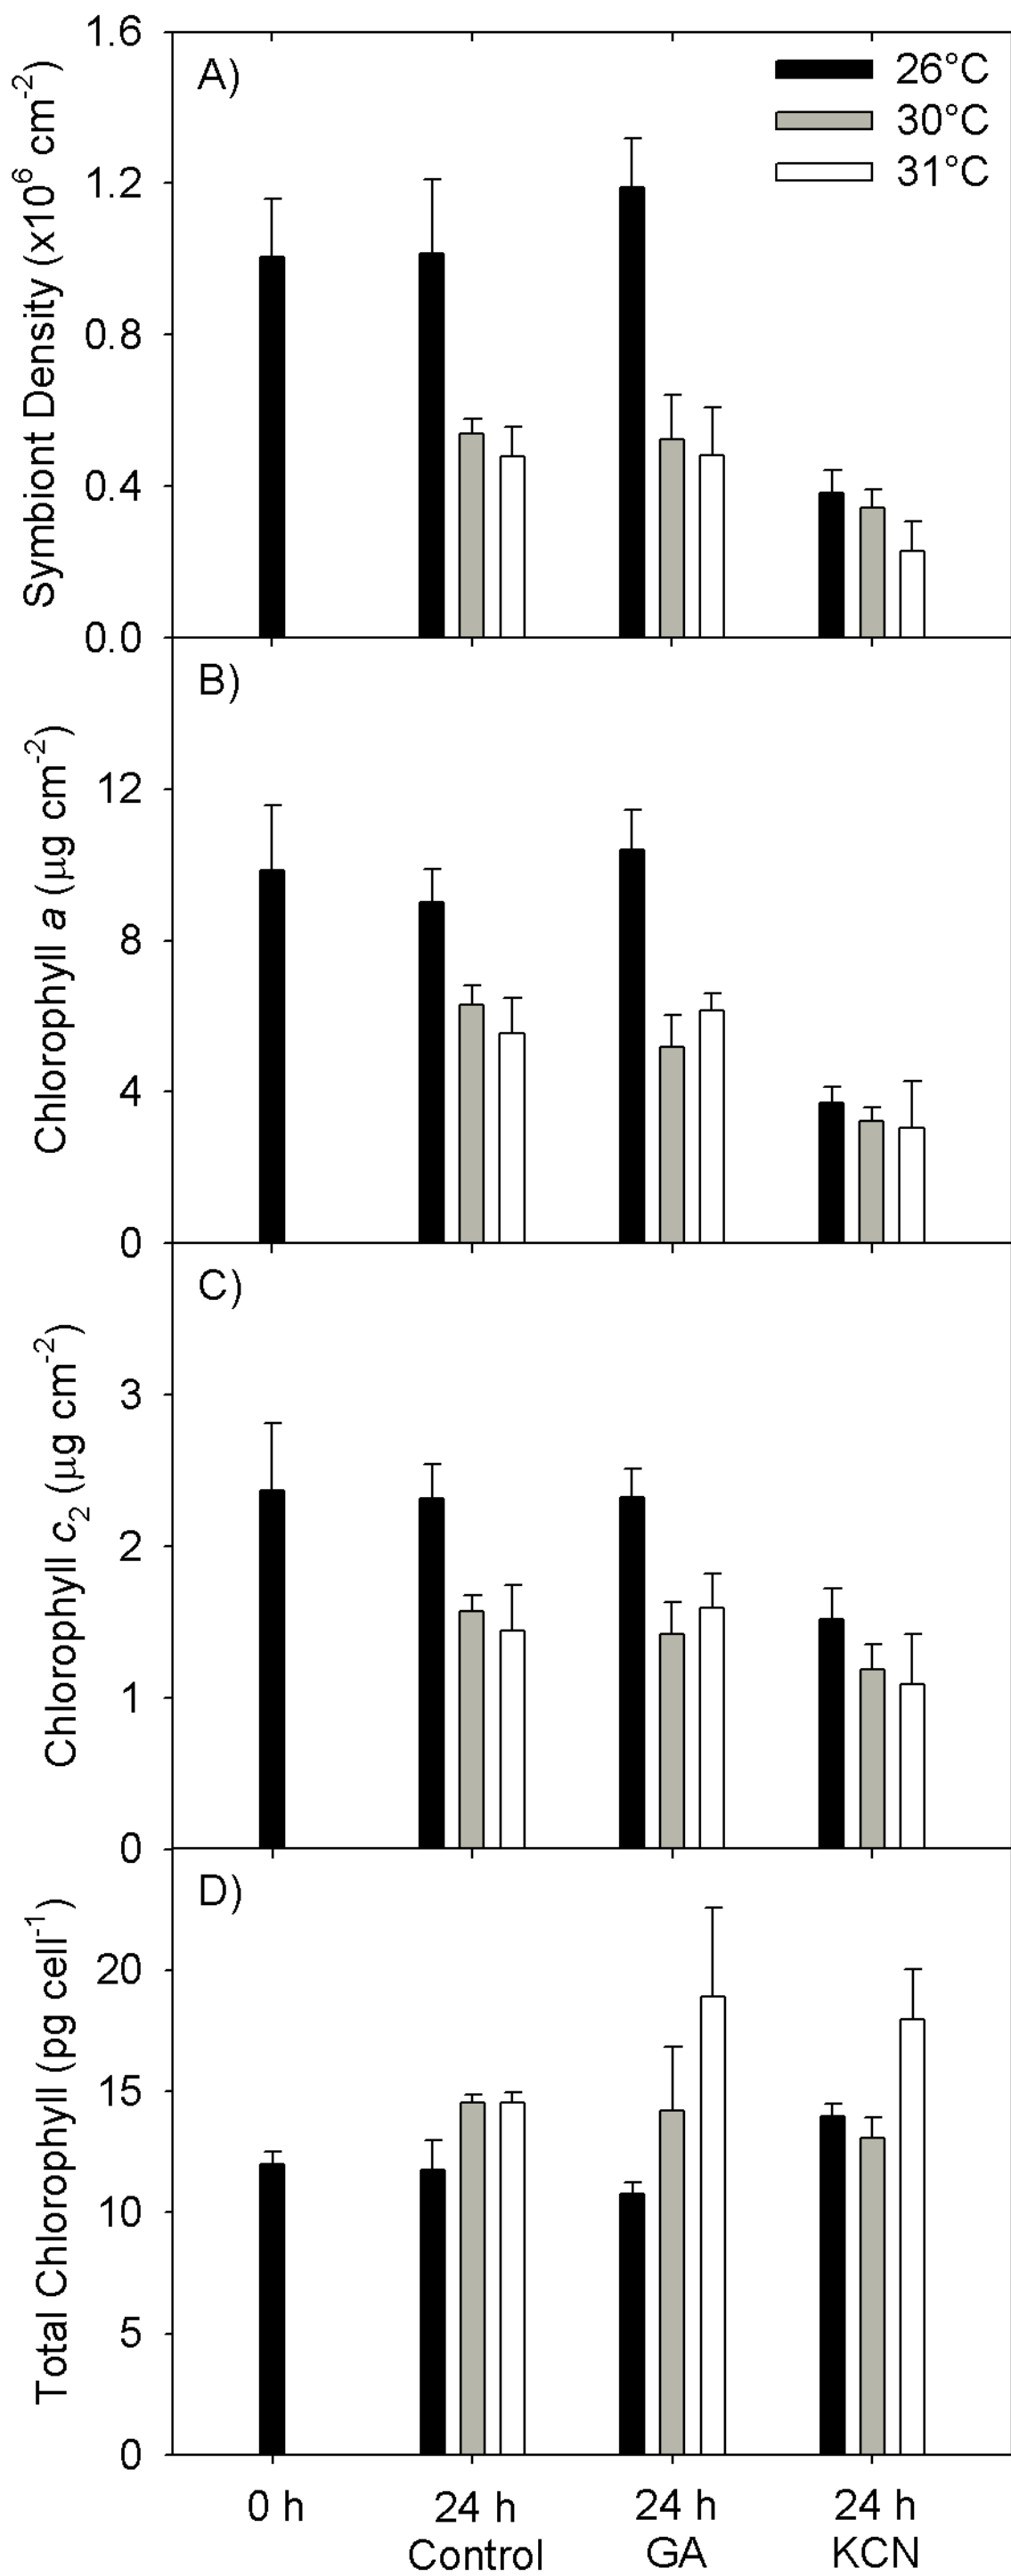

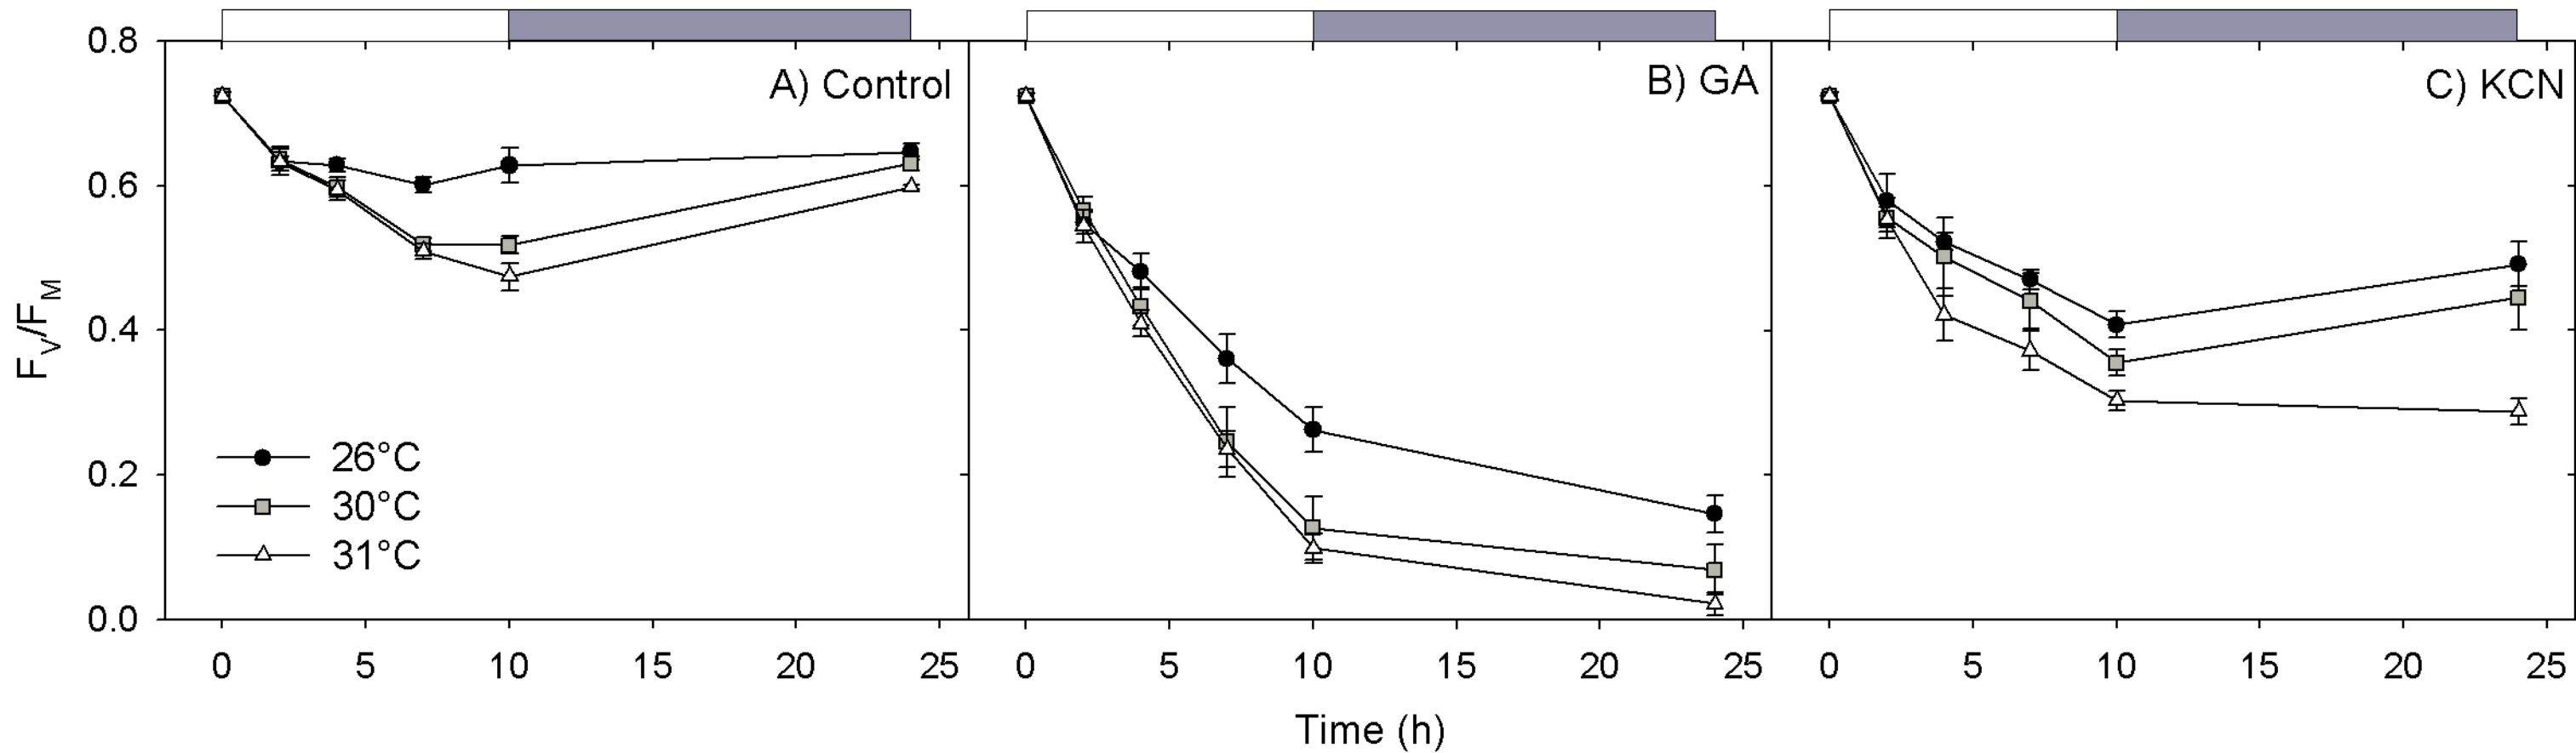

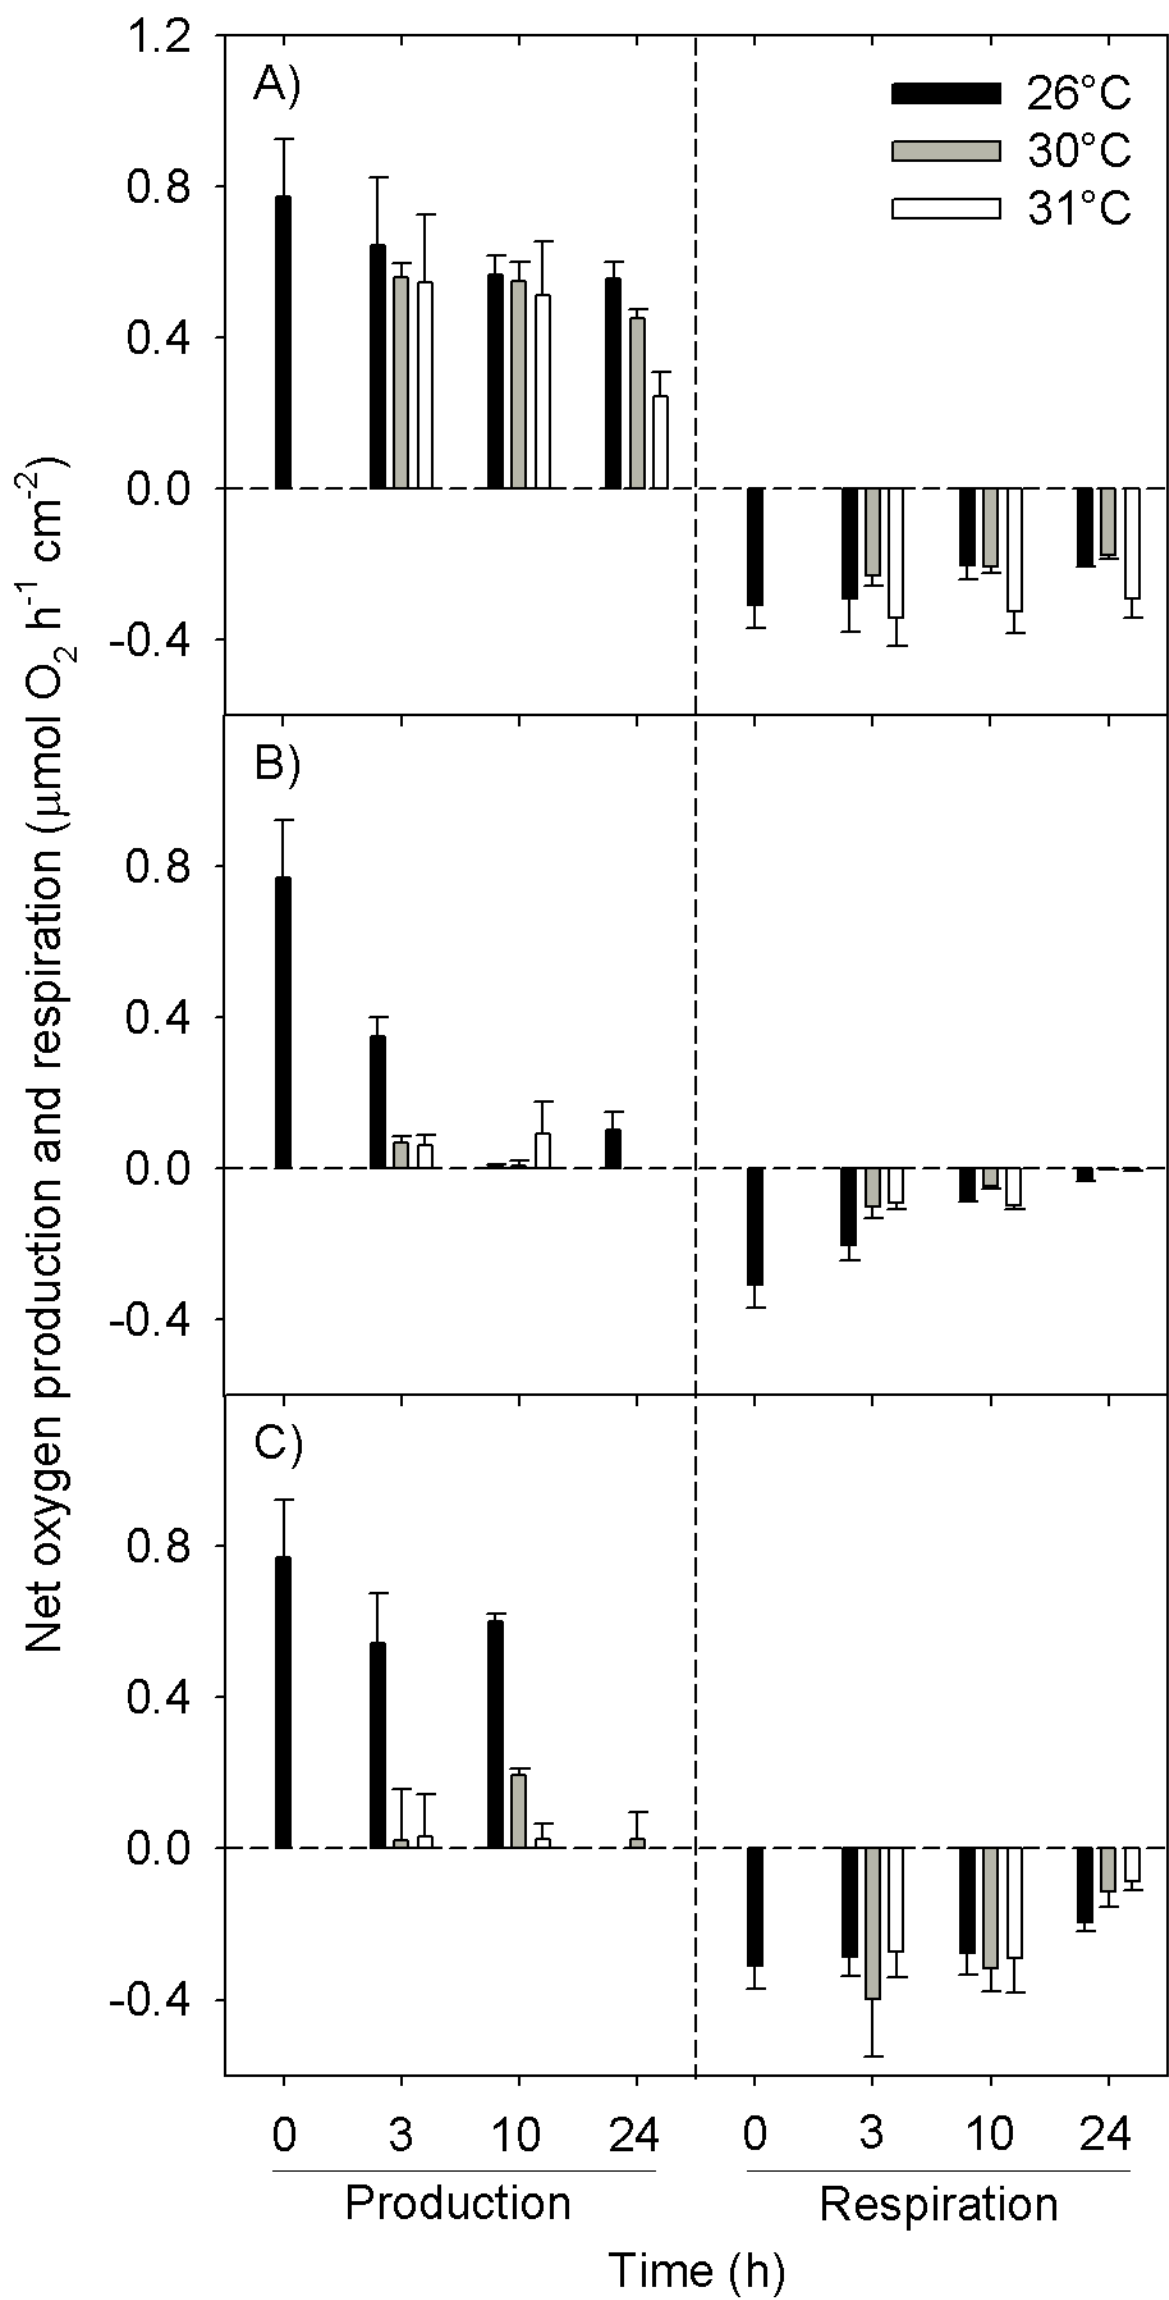

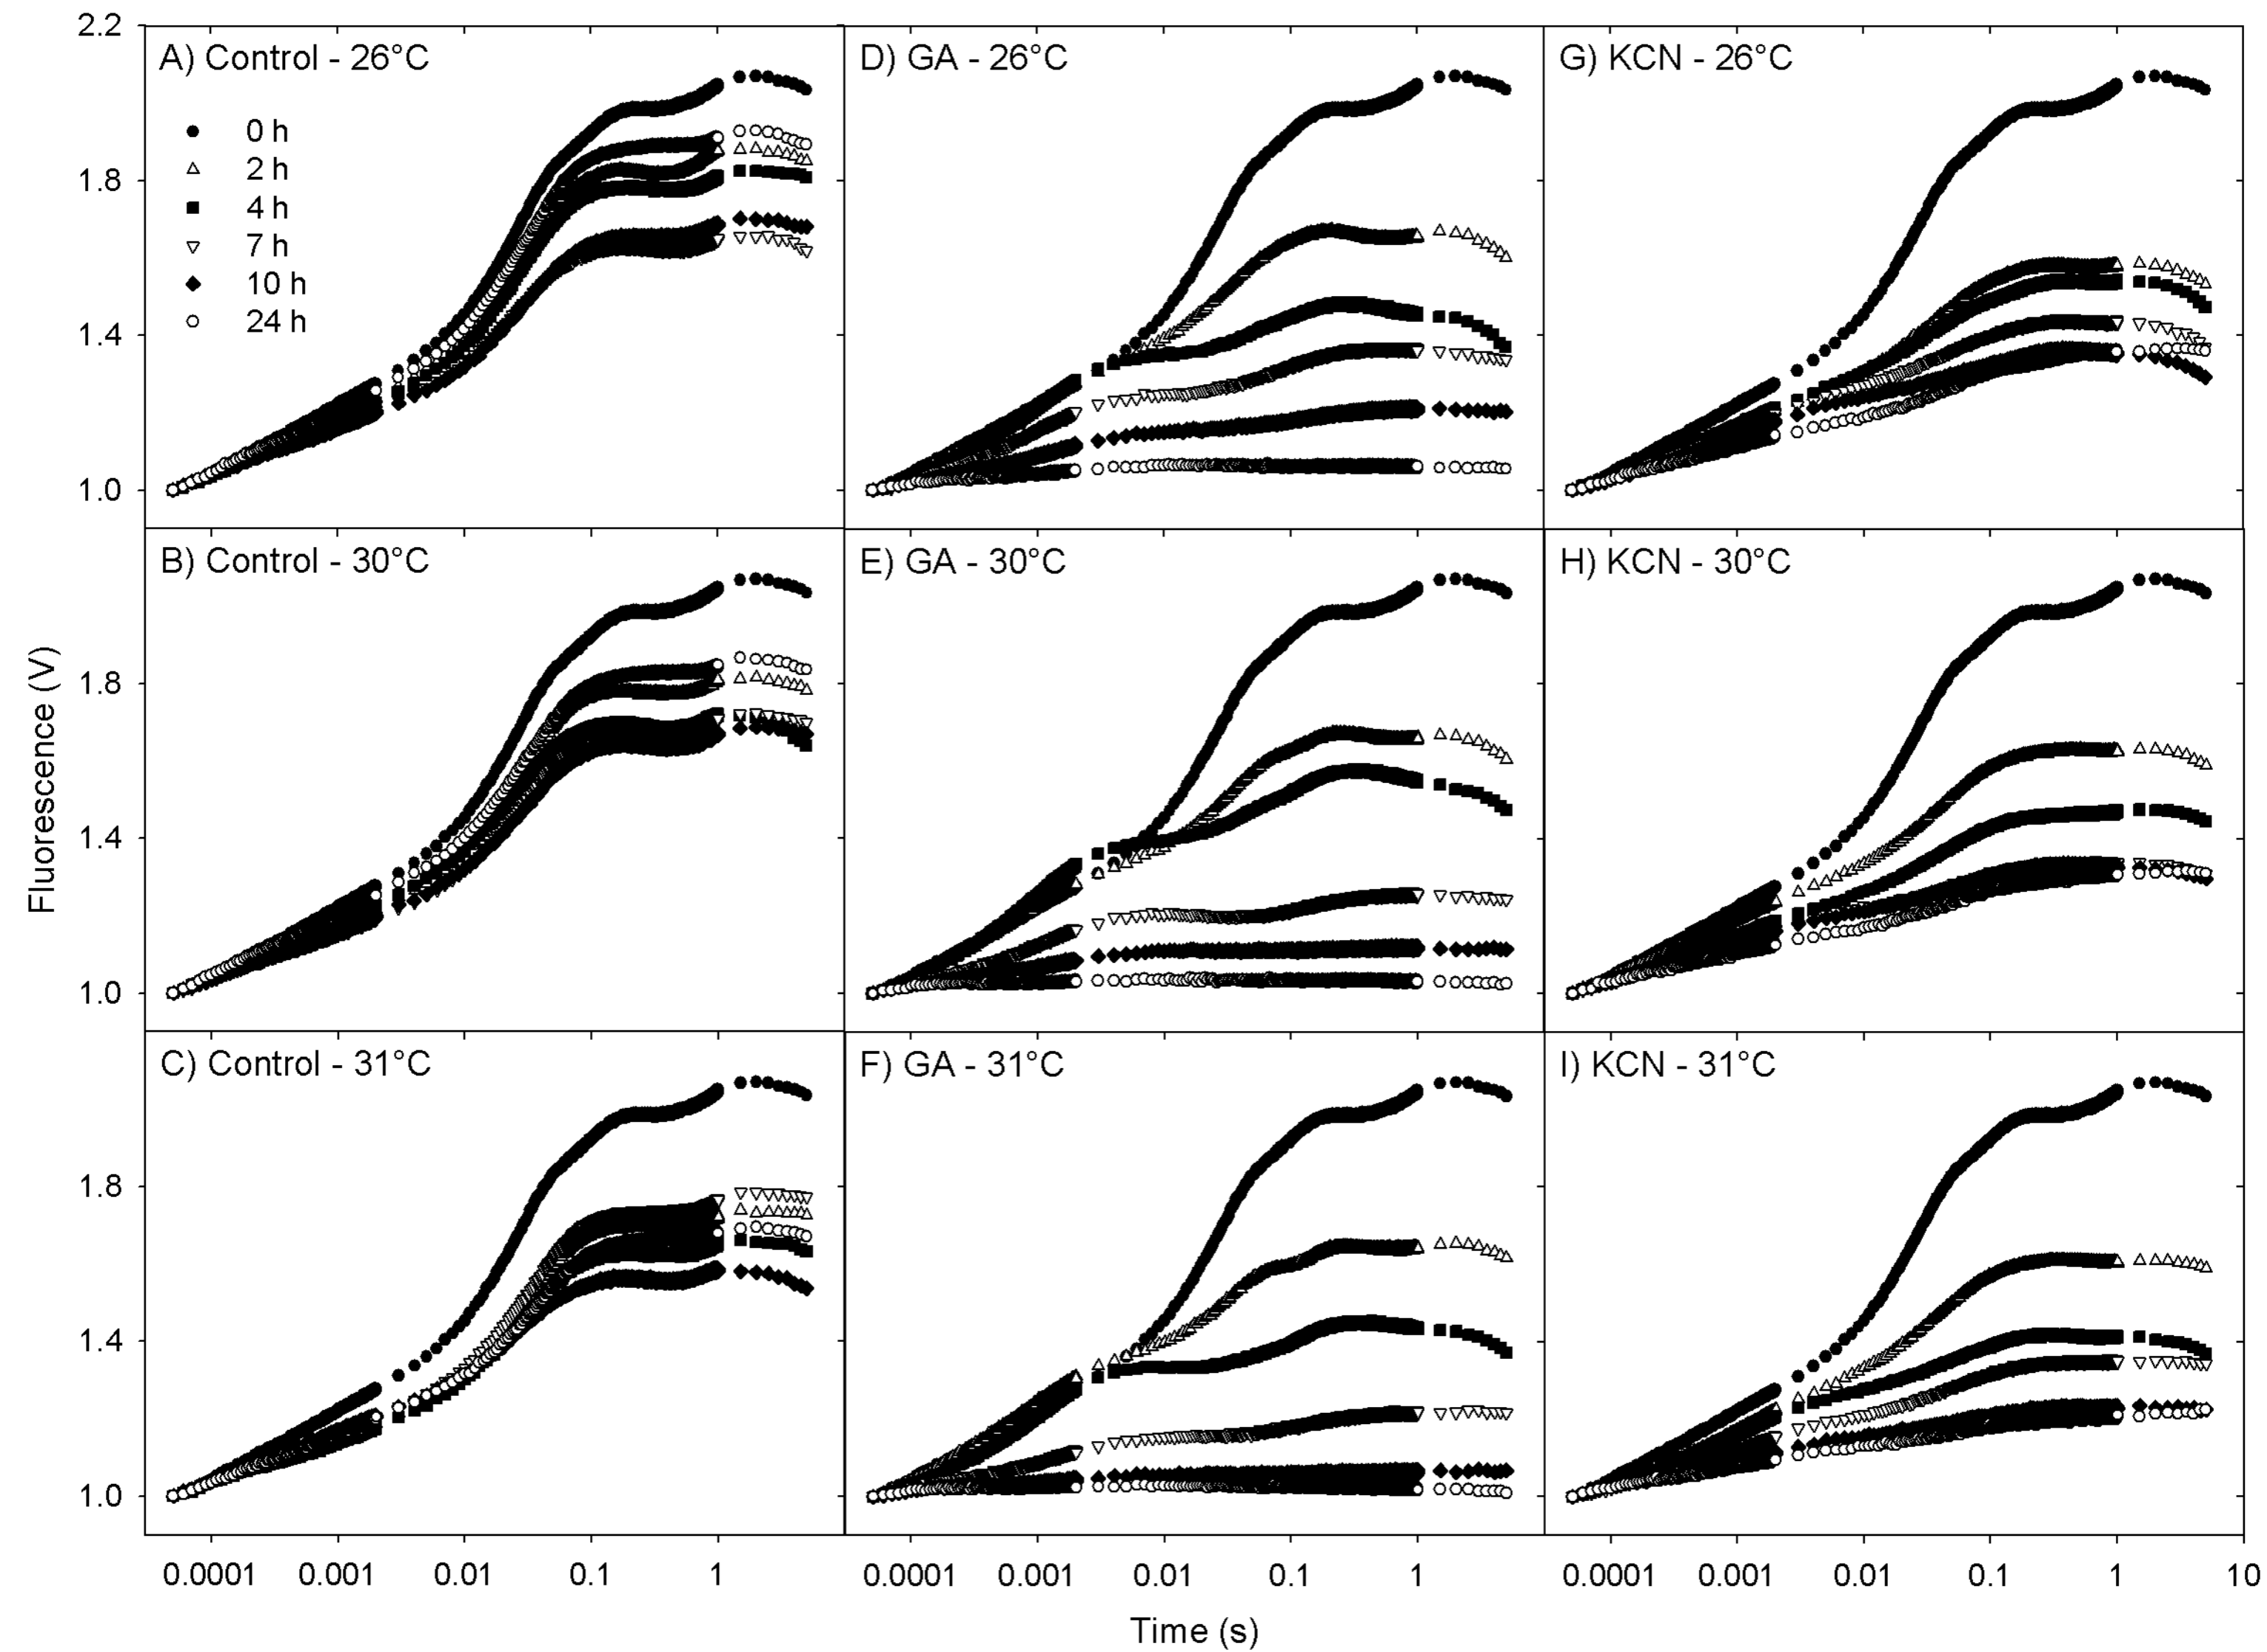



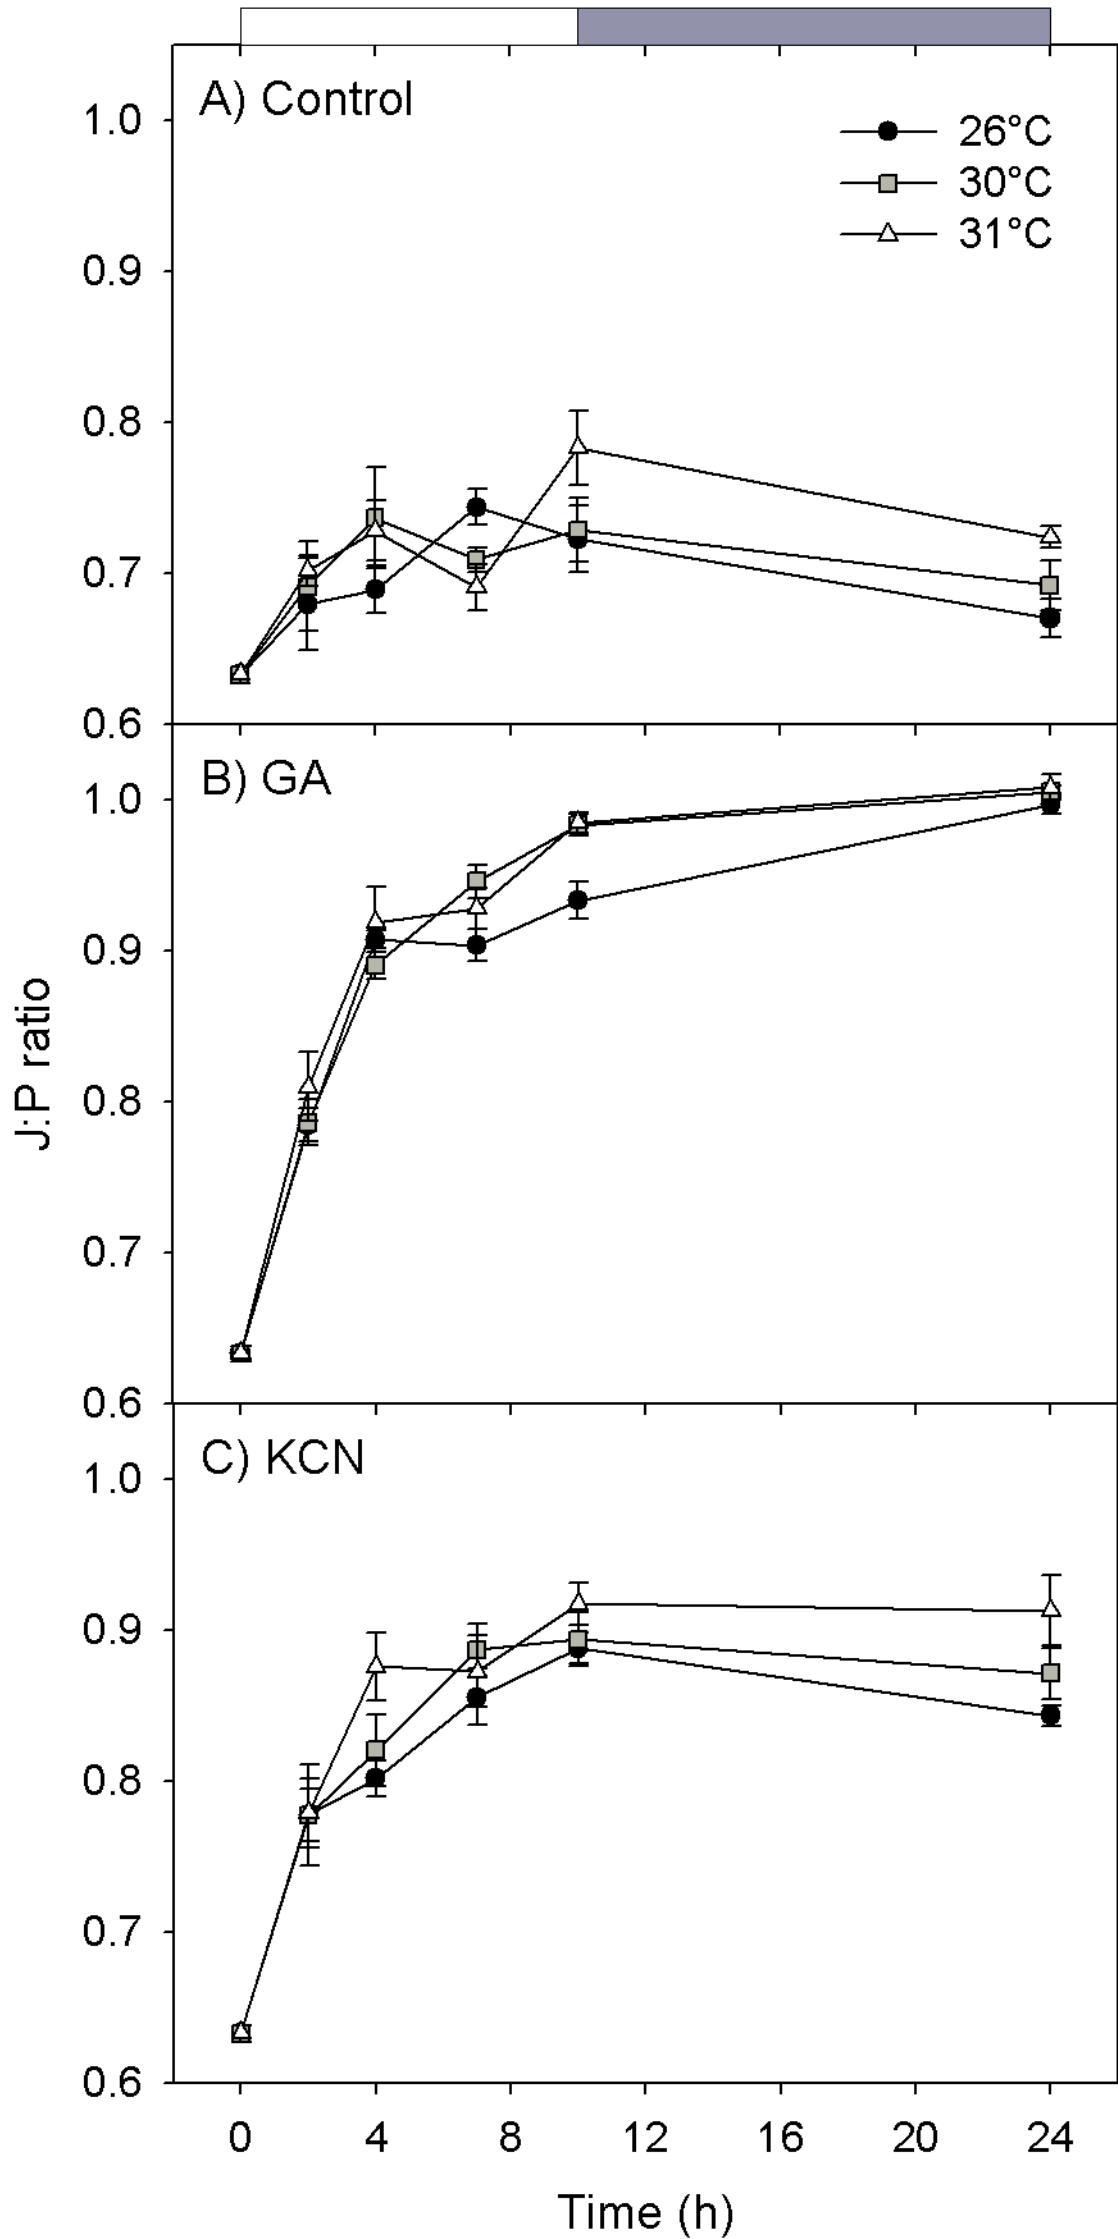

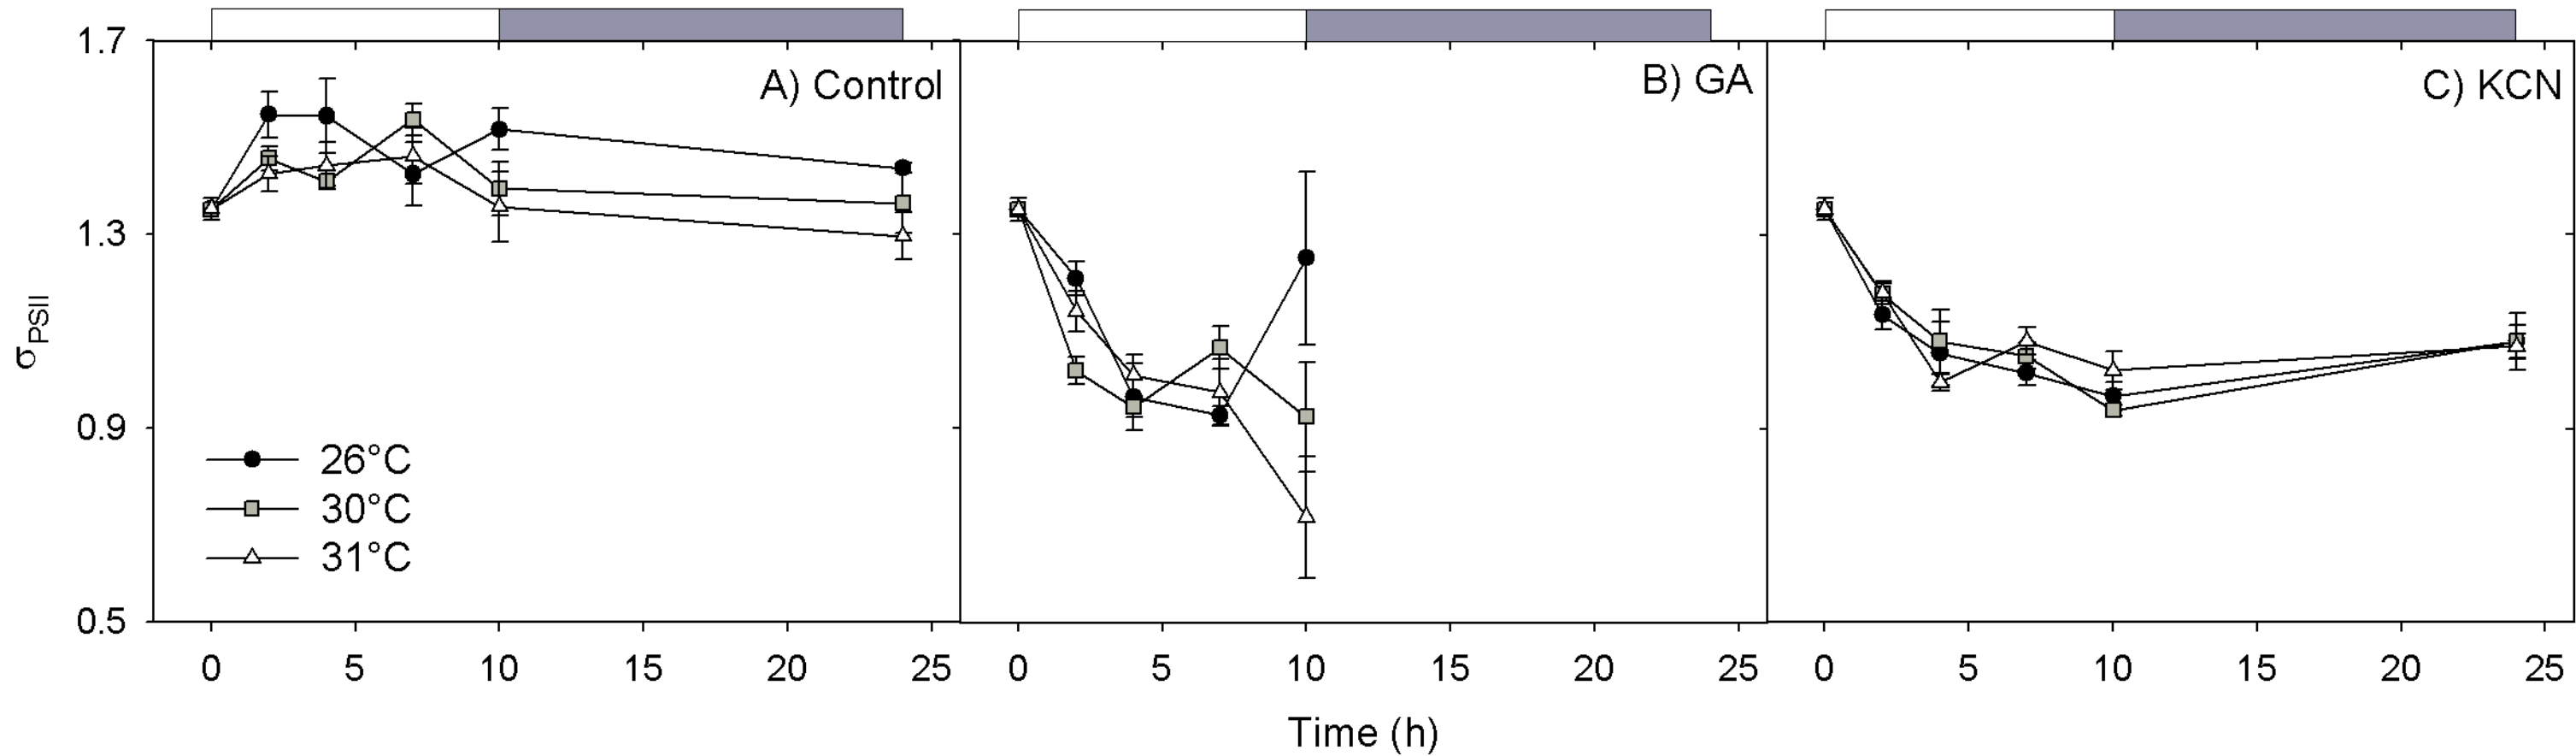

Source: https://cob.silverchair.com/jeb/article-pdf/doi/10.1242/jeb.100578/2037934/jeb_100578.pdf
